# Supplementary material for: Comprehensive and unbiased multiparameter high-throughput screening by compaRe finds effective and subtle drug responses in AML models
Source: eLife. 2022 Feb 15;11:e73760. doi: 10.7554/eLife.73760 (PMC9020823; doi:10.7554/eLife.73760)
Supplement: Supplementary file 1. [file elife-73760-supp1.xlsx]

## Sheet: Sheet1
Tube	Marker	Features	Aim of tube
All tubes	CD45	· CD45low immaturity marker for normal cells	Myeloblast identification
	CD117	· Myeloid marker
	CD34	· Expressed by a significant number of acute leukemias from any lineage
		· CD34- more mature myeloblast cells
		· CD34+ more immature myeloblast cells
		· CD34 is a marker of immaturity, which is not lineage-related
		· When expressed, CD34 is useful for identification of the blast cells
	HLADR	· In neutrophil/erythroid blasts where CD117+, the expressions of CD34 and HLA-DR gradually decrease
1	CD10	· Within the normal neutrophil lineage, CD10 is expressed in a maturation-stage-specific manner	Antibody combination for neutrophil maturation: Within the normal neutrophil lineage, several markers like CD10, CD11b, CD13 and CD16 are expressed in a maturation-stage specific manner. In combination with the backbone markers, these markers allow detailed characterization of the neutrophil maturation pathway from the most immature myeloid blast cells till the mature polynuclear neutrophilic gra…
	CD11b	· Within the normal neutrophil lineage, CD11b is expressed in a maturation-stage-specific manner
		· CD11b is absent on immature monocytic cells but it is expressed during later stages
		· CD36, CD14, CD4 and CD11b are primarily observed on blast cells from patients with an acute monocytic leukemia, t(9;11)+ AML, or AML with mutated NPM1
	CD13	· Myeloid lineage associated marker
		· Frequently expressed in ALL
		· Within the normal neutrophil lineage, CD13 is expressed in a maturation-stage-specific manner
	CD16	· Within the normal neutrophil lineage, CD16 is expressed in a maturation-stage-specific manner
2	CD14	· Considered to be the typical marker for monocytes, but this marker is only expressed during the intermediate to last stages of monocytic maturation	Antibody combination for monocytic maturation
		· CD36, CD14, CD4 and CD11b are primarily observed on blast cells from patients with an acute monocytic leukemia, t(9;11)+ AML, or AML with mutated NPM1
	CD35	· Is expressed by erythrocytes, granulocytes, monocytes, and dendritic cells
		· Is also expressed by the leukemic cells in a subset of AML
		· Immature monocytic cells could first express CD35, followed later by CyMPO, while in immature neutrophilic cells, expression of CyMPO clearly precedes that of CD35. CD35 can therefore contribute to distinguishing early monocytic and neutrophil differentiation stages
	CD64	· CD64 is already expressed during the earlier stages of monocytic differentiation
	CD300e	· Is a glycoprotein whose expression on normal hematopoietic cells is restricted to cells of the monocytic and myeloid dendritic cell lineages
		· During normal monocytic development, CD300e is expressed in the last stages of maturation after CD14 is highly expressed
		· In AML, CD300e is almost exclusively found on leukemic cells from patients with monocytic leukemia, its reactivity increasing from monoblastic to monocytic AML and CMML. Noteworthily, in a subgroup of these patients CD300e is already expressed before CD14
3	CD36	· CD36 is already expressed during the earlier stages of monocytic differentiation	Antibody combination for erythroid differentiation: For evaluation of the erythroid differentiation, these markers are informative.
		· CD36 is also informative for erythroid differentiation, and it appears on CD64hi monocytic precursors (that can be easily distinguished from other myeloid precursors based on its higher intensity of expression)
		· CD36 is already expressed during early stages of erythroid differentiation
		· CD36 expression remains at relatively high levels throughout the maturation of normal red blood cells
		· CD36, CD14, CD4 and CD11b are primarily observed on blast cells from patients with an acute monocytic leukemia, t(9;11)+ AML, or AML with mutated NPM1
	CD33	· Myeloid lineage associated marker
		· Frequently expressed in ALL as well
		· The expression of CD33 increases early during monocytic development to levels higher than those of granulocytic cells
		· CD33 expression is absent during the erythroid differentiation and could be used as an exclusion marker. At the same time CD33 also provides relevant information for the granulocytic and monocytic lineages, particularly once evaluated in the context of AML
		· Pan-myeloid marker CD33 is expressed on the vast majority of AML, but not on erythroid leukemias
	CD105	· CD105 are already expressed during early stages of erythroid differentiation
		· Expression of CD105 remains present after the CD71 expression is increased and subsequently disappears shortly after CD117 expression is lost, so that more mature erythroid cells no longer express CD105
		· Little is known about CD105 expression in AML, but aberrant CD105 expression has been reported in patients with MDS
		· Testing of CD105 on bone marrow samples from healthy subjects and AML patients showed optimal and specific staining of early erythroid cells at intermediate stages of erythroid maturation
	CD71	· For evaluation of the erythroid differentiation, CD71 is informative
4	CD19	· B-lineage associated marker	Antibody combination for aberrant cross-lineage antigen expression and altered B-cell precursors: The fourth tube in the EuroFlow AML/MDS antibody panel does not focus on a particular cell lineage but aims at the detection of aberrant expression of lymphoid-associated markers on myeloid cells
		· Expressed in a significant number of AML cases as well
		· A very sensitive B-lineage marker, which is expressed during the early stages of B-cell commitment
		· CD19 lacks specificity as it is also expressed in a subset of AML cases, albeit at lower and more heterogeneous levels
		· blast cells in AML with t(8;21) frequently co-express CD19
		· Frequently occurring cross-lineage marker is CD19 in AML with t(8;21)
		· Expressed on both mature and immature B cells: on mature B-lymphocytes (CD19+, CD20hi and CD45hi) and B-cell precursors (CD19+, CD20-/lo, CD45lo)
	CD56	· Frequently occurring cross-lineage marker
	CD7	· T-lineage associated marker
		· Expressed in a significant number of AML cases
		· It is positive in a subset of, usually CyMPO-negative, AML
		· Frequently occurring cross-lineage marker
