# Supplementary material for: Comprehensive and unbiased multiparameter high-throughput screening by compaRe finds effective and subtle drug responses in AML models
Source: eLife. 2022 Feb 15;11:e73760. doi: 10.7554/eLife.73760 (PMC9020823; doi:10.7554/eLife.73760)
Supplement: Supplementary file 2. [file elife-73760-supp2.xlsx]

## Sheet: Sheet1
Marker	Tube 1	Tube 2	Tube 3	Tube 4	Channel used by COMPARE
HLA-DR-BD Horizon V450	Yes	Yes	Yes	Yes	HLA-DR:V450-A
CD45-BD Horizon V500	Yes	Yes	Yes	Yes	CD45:V500-A
CD34-PerCPCy5.5	Yes	Yes	Yes	Yes	CD34:PerCP-Cy5-5-A
CD117-PECy7	Yes	Yes	Yes	Yes	CD117:PE-Cy7-A
CD16-FITC	Yes				CD16:FITC-A
CD13-PE	Yes				CD13:PE-A
CD11b-APC	Yes				CD11b:APC-A
CD10-APCH7	Yes				CD10:APC-H7-A
CD35-FITC		Yes			CD35:FITC-A
CD64-PE		Yes			CD64:PE-A
IREM2-APC		Yes			IREM2(CD300e):APC-A
CD14-APCH7		Yes			CD14:APC-H7-A
CD36-FITC			Yes		CD36:FITC-A
CD105-PE			Yes		CD105:PE-A
CD33-APC			Yes		CD33:APC-A
CD71-APCH7			Yes		CD71:APC-H7-A
NuTdT-FITC				Yes (not available in all samples)
CD56-PE				Yes	CD56:PE-A
CD7-APC				Yes	CD7:APC-A
CD19-APCH7				Yes	CD19:APC-H7-A
SSC					SSC-A
