# Supplementary material for: Comprehensive and unbiased multiparameter high-throughput screening by compaRe finds effective and subtle drug responses in AML models
Source: eLife. 2022 Feb 15;11:e73760. doi: 10.7554/eLife.73760 (PMC9020823; doi:10.7554/eLife.73760)
Supplement: Supplementary file 3. [file elife-73760-supp3.xlsx]

## Sheet: PTHMlrettetBehandlin-ForMorteza
Cytogenetics	Variants	Diagnosis	Diagnosis_date	Comments	Death	Follow-up period
46,XX[26]		AML_1	9	Complete remission	No	over 2 years, 7 months
46,XX[25]	DNMT3A NM_022552.4:c.2185C>T (39%) and NRAS NM_002524.4:c.34G>T (7%)	AML_2	11	Complete remission surprisingly only on one chemotherapy induction (DA 3+10). No signs of relapse	No	over 2 years, 6 months
45,XX,der(5;16)(p10;p10),-7,+8,-17,+mar[12]/45,idem,add(13)(q34)[5]/45,idem,i(21)(q10)[2]/46,XX[6]		AML_3	12	Complex caryotype (adverse prognosis)	Yes	over 1 month
46,XY[26]		AML_4	13	Normal caryotype	Yes	over 4 months
47,XX,+13[4]/46,XX[21]		AML_5	18	Aggressive, refractory disease	Yes	over 1 month
46,XX[24]		AML_6	20	MRD+ after induction Has now received allo-BMT and is in remission	No	over 2 years, 3 months
46,XX[25]		AML_7	21	Complete remission, but has mild myelodysplasia after therapy	No	over 2 years, 3 months
46,XX,t(15;17)(q24;q21)[19]/46,XX[4]		AML_8	22	APL, developed cerebral infarcts during chemotherapy induction	Yes	less than a month
46,XY[25]	IDH1 NM_005896.3:c.395G>A; p.(Arg132His) (46%)	AML_9	25	Complete remission. NPM1 mutation. Has also multiple myeloma	No	over 2 years, 1 months
44-48,XY,de r(7;12)( q l0;q 10),+8,+8,del (13) ( q12q14) [ cp20]		HrMDS_1	1	No response to therapy (azacytidine) Progression to AML in june 2019	Yes	over 3 years, 7 months
46,XY[26]		HrMDS_2	2	Progression to AML february 2019	Yes	over 2 years, 5 months
46,XY[50]	IDH2 exon 4 (NM_002168.3:c.419G>A; p.(Arg140Gln) (50%) and SRSF2 P95 (exon 1) NM_003016.4:c.284C>A; p.(Pro95His) (51%) and ASXL1 exon 14 frameshift (COSM34210)	HrMDS_3	16	Relapse after 19 series guadecitabine in august 2020	No	over 2 years, 4 months
47,XY,+8[13]/46,XY[8]	ASXL1 exon 14 NM_015338.5:c.2177del; p.(Lys726Argfs*18) (48%) and TP53 exon 3-11 NM_000546.5:c.718A>T; p.(Ser240Cys) (18%) and RUNX1 exon 3-8 NM_001754.4:c.790C>T; p.(Gln264*) (5%) and SRSF2 P95 (exon 1) NM_003016.4:c.284C>A; p.(Pro95His) (49%)	HrMDS_4	17	No response to therapy (guadecitabine)	Yes	over 5 months
46,XX,del(5)(q?22q?35)[11]/47,idem,+11[4]/46,XX[11]	DNMT3A exon 7-23 NM_022552.4:c.1903C>T; p.(Arg635Trp) (41%) and ASXL1 exon 14 NM_015338.5:c.1773C>G; p.(Tyr591* (11%) and RUNX1 exon 3-8 NM_001754.4:c.229_248del; p.(Ser77Argfs*54) (5%) and RUNX1 exon 3-8 NM_001754.4:c.620G>A; p.(Arg207Gln) (6%)	HrMDS_5	24	Progression to AML july 2019	Yes	over 1 year, 9 months
46,del(20)(q12)[2]		LrMDS_1	3	No progression	Yes	over 3 years, 1 month
42~44,XY,-3,del(3)(p21),-4,del(4)(q?31),dup(5) (q13q23orq31),-7,del(11)(p14),-12,-13,-14,add(14) (p11),del(16)(q22),del(17)(p11.2),add(19)(p13 or q13),add(20) (q13),add(21)(p11),+2mar,inc[cp11]/46,X,-Y[5]/46,XY[8]		LrMDS_10	19	Complex caryotype, no response to therapy (azacytidine) Features of a HrMDS despite lasts < 5%	Yes	over 2 months
arr[hg19]5q12.3.q35.3(64157620-180,719,789)x1,17p13.3p13.p1 2p11.1(280253-22217680)x1	ASXL1 exon 14 NM_015338.5:c.2455G>T; p.(Gly819*) (14%) and TP53 exon 3-11 NM_000546.4:c.473G>A; p.(Arg158His) (8%)	LrMDS_11	23	No effect of treatment, progression in june 2020	Yes	over 1 year, 8 months
46,XY[25]	U2AF1 Q157 (exon 7) NM_001025203.1:c.470A>C; p.(Gln157Pro) (13%)	LrMDS_2	4	No progression	Yes	over 1 year, 10 months
46,XY[25]	ASXL1 exon 14 NM_015338.5:c.1934dup; p.(Gly646Trpfs*12) (35%) and SRSF2 P95 (exon 1) NM_003016.4:c.283C>A; p.(Pro95Thr) (46%)	LrMDS_3	5	No progression	Yes	over 1 year, 10 months
46,XX,del(7)(q32)[8]/46,XX[17]		LrMDS_4	6	Progression to AML february 2019	Yes	over 1 year, 9 months
46,XX[26]	SF3B1 exon 13-15 NM_012433.3:c.1986C>G; p.(His662Gln) (44%)	LrMDS_5	7	Refractory anemia with ringed sideroblasts No progression	No	over 2 years, 7 months
46,XY[26]	TET2 NM_001127208.2:c.658del; p.(His220Thrfs*30) (34%) NM_001127208.2:c.945del;p.(Gln317Argfs*30) (35%) and SRSF2 P95 (exon 1) NM_001195427.1:c.284C>G; p.(Pro95Arg) (37%)	LrMDS_6	8	No progression	No	over 2 years, 7 months
46,XY[25]		LrMDS_7	10	No progression	No	over 2 years, 6 months
46,XY[25]	TET2 NM_001127208.2:c.1432G>T; p.(Glu478*) (46%) and TET2 NM_001127208.2:c.5666C>G; p.(Pro1889Arg) (35%) and ZRSR2 NM_005089.3:c.525C>G; p.(Tyr175*) (93%)	LrMDS_8	14	Normal caryotype, no progression	Yes	over 1 year, 1 month
	TET2 NM_001127208.2:c.3820C>T; p.(Gln1274*) (43%) and TET2 NM_001127208.2:c.1771C>T; p.(Gln591*) (46%) and JAK2 V617F (exon 14) NM_004972.3:c.1849G>T; p.(Val617Phe) (20%)	LrMDS_9	15	TET2 mutation, no progression Has also a myeloproliferative neoplasm (JAK2 mutation)	No	over 2 years, 4 months
