# Supplementary material for: Comprehensive and unbiased multiparameter high-throughput screening by compaRe finds effective and subtle drug responses in AML models
Source: eLife. 2022 Feb 15;11:e73760. doi: 10.7554/eLife.73760 (PMC9020823; doi:10.7554/eLife.73760)
Supplement: Supplementary file 4. [file elife-73760-supp4.xlsx]

## Sheet: Layout with Names
Plate 1	1	2	3	4	5	6	7	8	9	10	11	12	13	14	15	16	17	18	19	20	21	22	23	24
A	empty	BzCl	empty	empty	empty	empty	empty	empty	empty	empty	empty	empty	empty	empty	empty	empty	empty	empty	empty	empty	empty	empty	BzCl	BzCl
B	empty	Metformin	Imatinib	Dexamethasone	Celecoxib	Vincristine	Methylprednisolone	Mepacrine	DMSO	Palbociclib	Copanlisib	Alvocidib	AZD-1775	Belinostat	Trametinib	BzCl	Onalespib	Axitinib	Lenalidomide	Olaparib	Sorafenib	Sunitinib	Quizartinib	BzCl
C	empty	Metformin	Idarubicin	Dexamethasone	Celecoxib	Cytarabine	Methylprednisolone	Mepacrine	Methotrexate	Palbociclib	Afatinib	DMSO	AZD-1775	Belinostat	Trametinib	Ruxolitinib	Onalespib	Axitinib	Lenalidomide	DMSO	Gemcitabine	Sunitinib	Quizartinib	empty
D	empty	Metformin	Idarubicin	Tretinoin	DMSO	Cytarabine	Methylprednisolone	Mepacrine	Methotrexate	Palbociclib	Afatinib	Alvocidib	AZD-1775	Rucaparib	Trametinib	Alisertib	Onalespib	Axitinib	Panobinostat	Olaparib	Gemcitabine	Sunitinib	Quizartinib	empty
E	empty	Metformin	Idarubicin	Tretinoin	Celecoxib	Cytarabine	Mitoxantrone	Mepacrine	Hydroxyurea	Palbociclib	Afatinib	Alvocidib	AZD-1775	Rucaparib	DMSO	Alisertib	Vemurafenib	Axitinib	Panobinostat	Olaparib	Gemcitabine	Azacitidine	Quizartinib	empty
F	empty	Metformin	Idarubicin	Tretinoin	Celecoxib	Cytarabine	Mitoxantrone	Mepacrine	Hydroxyurea	BzCl	Afatinib	Tipifarnib	AZD-1775	Rucaparib	Trametinib	Alisertib	Vemurafenib	Axitinib	Panobinostat	Olaparib	Gemcitabine	Azacitidine	Carfilzomib	empty
G	empty	Anagrelide	Idarubicin	Tretinoin	Clofarabine	BzCl	Mitoxantrone	Topotecan	Hydroxyurea	Navitoclax	Afatinib	Tipifarnib	AZD1152-HQPA	Rucaparib	Everolimus	Alisertib	Vemurafenib	Bosutinib	Panobinostat	Vismodegib	Gemcitabine	Azacitidine	Carfilzomib	empty
H	empty	Anagrelide	Erlotinib	Tretinoin	Clofarabine	Cytarabine	Mitoxantrone	Topotecan	Hydroxyurea	Navitoclax	Alectinib	Tipifarnib	AZD1152-HQPA	Rucaparib	Everolimus	Alisertib	Vemurafenib	Bosutinib	DMSO	Vismodegib	Etoposide	Azacitidine	Carfilzomib	empty
I	empty	Anagrelide	Erlotinib	Bortezomib	Clofarabine	Cytarabine/Idarubicin	Mitoxantrone	DMSO	Hydroxyurea	Navitoclax	Alectinib	Tipifarnib	AZD1152-HQPA	Idelalisib	Everolimus	Nilotinib	Vemurafenib	Bosutinib	Panobinostat	Vismodegib	Etoposide	Azacitidine	Carfilzomib	empty
J	empty	Anagrelide	Erlotinib	Bortezomib	Clofarabine	Cytarabine/Idarubicin	Paclitaxel	Topotecan	Pravastatin	Navitoclax	Alectinib	Tipifarnib	AZD1152-HQPA	BzCl	Everolimus	Nilotinib	Dasatinib	Bosutinib	Vorinostat	Vismodegib	Etoposide	Fludarabine	Carfilzomib	empty
K	empty	Anagrelide	Erlotinib	Bortezomib	Clofarabine	Cytarabine/Idarubicin	Paclitaxel	Topotecan	Pravastatin	Navitoclax	Alectinib	Ponatinib	AZD1152-HQPA	Idelalisib	Everolimus	Nilotinib	Dasatinib	Bosutinib	Vorinostat	Vismodegib	BzCl	Fludarabine	Midostaurin	empty
L	empty	Imatinib	Erlotinib	Bortezomib	Vincristine	Cytarabine/Idarubicin	Paclitaxel	Topotecan	Pravastatin	Copanlisib	Alectinib	Ponatinib	Belinostat	Idelalisib	Ruxolitinib	Nilotinib	DMSO	Lenalidomide	Vorinostat	Sorafenib	Etoposide	Fludarabine	Midostaurin	empty
M	empty	Imatinib	Dexamethasone	BzCl	Vincristine	Cytarabine/Idarubicin	Paclitaxel	Methotrexate	Pravastatin	Copanlisib	Alvocidib	Ponatinib	Belinostat	Idelalisib	Ruxolitinib	Nilotinib	Dasatinib	Lenalidomide	Vorinostat	Sorafenib	Etoposide	Fludarabine	Midostaurin	empty
N	empty	Imatinib	Dexamethasone	Bortezomib	Vincristine	Methylprednisolone	DMSO	Methotrexate	Pravastatin	Copanlisib	BzCl	Ponatinib	Belinostat	Idelalisib	Ruxolitinib	Onalespib	Dasatinib	Lenalidomide	Vorinostat	Sorafenib	Sunitinib	Fludarabine	Midostaurin	empty
O	empty	Imatinib	Dexamethasone	Celecoxib	Vincristine	Methylprednisolone	Paclitaxel	Methotrexate	Palbociclib	Copanlisib	Alvocidib	Ponatinib	DMSO	Trametinib	Ruxolitinib	Onalespib	Dasatinib	BzCl	Olaparib	Sorafenib	Sunitinib	Quizartinib	Midostaurin	empty
P	empty	empty	DMSO	empty	empty	empty	empty	empty	empty	empty	empty	empty	empty	empty	empty	empty	empty	empty	empty	empty	empty	DMSO	empty	empty
Plate 2	1	2	3	4	5	6	7	8	9	10	11	12	13	14	15	16	17	18	19	20	21	22	23	24
A	empty	BzCl	empty	empty	empty	empty	empty	empty	empty	empty	empty	empty	empty	empty	empty	empty	empty	empty	empty	empty	empty	empty	BzCl	BzCl
B	empty	Regorafenib	Valproic acid	Galunisertib	Tosedostat	Ibrutinib	MLN-0128	Crenolanib	DMSO	Pevonedistat	Ipatasertib	Alpelisib	Larotrectinib	SCH772984	Hydroxyfasudil	BzCl	LCL161	Selinexor	NVP-PIM447	Filanesib	Amcasertib	AMG-232	Glasdegib	empty
C	empty	Regorafenib	Volasertib	Galunisertib	Tosedostat	NVP-BGJ398	MLN-0128	Crenolanib	Vistusertib	Pevonedistat	Rocilinostat	DMSO	Larotrectinib	SCH772984	Hydroxyfasudil	GSK2879552	LCL161	Selinexor	NVP-PIM447	DMSO	BGB324	AMG-232	Glasdegib	BzCl
D	empty	Regorafenib	Volasertib	Nintedanib	DMSO	NVP-BGJ398	MLN-0128	Crenolanib	Vistusertib	Pevonedistat	Rocilinostat	Alpelisib	Larotrectinib	Abemaciclib	Hydroxyfasudil	Silmitasertib	LCL161	Selinexor	Pacritinib	Filanesib	BGB324	AMG-232	Glasdegib	empty
E	empty	Regorafenib	Volasertib	Nintedanib	Tosedostat	NVP-BGJ398	Dinaciclib	Crenolanib	CPI-613	Pevonedistat	Rocilinostat	Alpelisib	Larotrectinib	Abemaciclib	DMSO	Silmitasertib	Tazemetostat	Selinexor	Pacritinib	Filanesib	BGB324	GSK525762	Glasdegib	empty
F	empty	Regorafenib	Volasertib	Nintedanib	Tosedostat	NVP-BGJ398	Dinaciclib	Crenolanib	CPI-613	BzCl	Rocilinostat	Pomalidomide	Larotrectinib	Abemaciclib	Hydroxyfasudil	Silmitasertib	Tazemetostat	Selinexor	Pacritinib	Filanesib	BGB324	GSK525762	AZD0156	empty
G	empty	Chloroquine	Volasertib	Nintedanib	MK-0752	BzCl	Dinaciclib	Birinapant	CPI-613	Venetoclax	Rocilinostat	Pomalidomide	Duvelisib	Abemaciclib	Gedatolisib	Silmitasertib	Tazemetostat	Birabresib	Pacritinib	Cobimetinib	BGB324	GSK525762	AZD0156	empty
H	empty	Chloroquine	Omacetaxine	Nintedanib	MK-0752	NVP-BGJ398	Dinaciclib	Birinapant	CPI-613	Venetoclax	BRD7116	Pomalidomide	Duvelisib	Abemaciclib	Gedatolisib	Silmitasertib	Tazemetostat	Birabresib	DMSO	Cobimetinib	Entospletinib	GSK525762	AZD0156	empty
I	empty	Chloroquine	Omacetaxine	PTC-209	MK-0752	Momelotinib	Dinaciclib	DMSO	CPI-613	Venetoclax	BRD7116	Pomalidomide	Duvelisib	Ceritinib	Gedatolisib	AZD-8186	Tazemetostat	Birabresib	Pacritinib	Cobimetinib	Entospletinib	GSK525762	AZD0156	empty
J	empty	Chloroquine	Omacetaxine	PTC-209	MK-0752	Momelotinib	Ralimetinib	Birinapant	FG-4592	Venetoclax	BRD7116	Pomalidomide	Duvelisib	BzCl	Gedatolisib	AZD-8186	EPZ-5676	Birabresib	Idasanutlin	Cobimetinib	Entospletinib	Taselisib	AZD0156	empty
K	empty	Chloroquine	Omacetaxine	PTC-209	MK-0752	Momelotinib	Ralimetinib	Birinapant	FG-4592	Venetoclax	BRD7116	NVP-SHP099	Duvelisib	Ceritinib	Gedatolisib	AZD-8186	EPZ-5676	Birabresib	Idasanutlin	Cobimetinib	BzCl	Taselisib	VS-4718	empty
L	empty	Valproic acid	Omacetaxine	PTC-209	Ibrutinib	Momelotinib	Ralimetinib	Birinapant	FG-4592	Ipatasertib	BRD7116	NVP-SHP099	SCH772984	Ceritinib	GSK2879552	AZD-8186	DMSO	NVP-PIM447	Idasanutlin	Amcasertib	Entospletinib	Taselisib	VS-4718	empty
M	empty	Valproic acid	Galunisertib	BzCl	Ibrutinib	Momelotinib	Ralimetinib	Vistusertib	FG-4592	Ipatasertib	Alpelisib	NVP-SHP099	SCH772984	Ceritinib	GSK2879552	AZD-8186	EPZ-5676	NVP-PIM447	Idasanutlin	Amcasertib	Entospletinib	Taselisib	VS-4718	empty
N	empty	Valproic acid	Galunisertib	PTC-209	Ibrutinib	MLN-0128	DMSO	Vistusertib	FG-4592	Ipatasertib	BzCl	NVP-SHP099	SCH772984	Ceritinib	GSK2879552	LCL161	EPZ-5676	NVP-PIM447	Idasanutlin	Amcasertib	AMG-232	Taselisib	VS-4718	empty
O	empty	Valproic acid	Galunisertib	Tosedostat	Ibrutinib	MLN-0128	Ralimetinib	Vistusertib	Pevonedistat	Ipatasertib	Alpelisib	NVP-SHP099	DMSO	Hydroxyfasudil	GSK2879552	LCL161	EPZ-5676	BzCl	Filanesib	Amcasertib	AMG-232	Glasdegib	VS-4718	empty
P	empty	empty	DMSO	empty	empty	empty	empty	empty	empty	empty	empty	empty	empty	empty	empty	empty	empty	empty	empty	empty	empty	DMSO	empty	empty

## Sheet: Drug plate annotations
PLATE 1	DRUG_NAME	SupplierRef	Supplier	Solvent	Well	Concentration (nM)			PLATE 2	DRUG_NAME	SupplierRef	Supplier	Solvent	Well	Concentration (nM)
	Afatinib	S1011	Selleck	DMSO	C11	1000				Abemaciclib	S7158	Selleck	DMSO	D14	2500
	Afatinib	S1011	Selleck	DMSO	D11	100				Abemaciclib	S7158	Selleck	DMSO	E14	250
	Afatinib	S1011	Selleck	DMSO	E11	10				Abemaciclib	S7158	Selleck	DMSO	F14	25
	Afatinib	S1011	Selleck	DMSO	F11	1				Abemaciclib	S7158	Selleck	DMSO	G14	2.5
	Afatinib	S1011	Selleck	DMSO	G11	0.1				Abemaciclib	S7158	Selleck	DMSO	H14	0.25
	Alectinib	CT-CH542	ChemieTek	DMSO	H11	1000				Alpelisib	S2814	Selleck	DMSO	M11	2500
	Alectinib	CT-CH542	ChemieTek	DMSO	I11	100				Alpelisib	S2814	Selleck	DMSO	O11	250
	Alectinib	CT-CH542	ChemieTek	DMSO	J11	10				Alpelisib	S2814	Selleck	DMSO	B12	25
	Alectinib	CT-CH542	ChemieTek	DMSO	K11	1				Alpelisib	S2814	Selleck	DMSO	D12	2.5
	Alectinib	CT-CH542	ChemieTek	DMSO	L11	0.1				Alpelisib	S2814	Selleck	DMSO	E12	0.25
	Alisertib	HY-10971	Medchemexpress	DMSO	D16	10000				Amcasertib	HY-17602	Medchemexpress	DMSO	L20	10000
	Alisertib	HY-10971	Medchemexpress	DMSO	E16	1000				Amcasertib	HY-17602	Medchemexpress	DMSO	M20	1000
	Alisertib	HY-10971	Medchemexpress	DMSO	F16	100				Amcasertib	HY-17602	Medchemexpress	DMSO	N20	100
	Alisertib	HY-10971	Medchemexpress	DMSO	G16	10				Amcasertib	HY-17602	Medchemexpress	DMSO	O20	10
	Alisertib	HY-10971	Medchemexpress	DMSO	H16	1				Amcasertib	HY-17602	Medchemexpress	DMSO	B21	1
	Alvocidib	S1230	Selleck	DMSO	M11	10000				AMG-232	CT-AMG232	ChemieTek	DMSO	N21	1000
	Alvocidib	S1230	Selleck	DMSO	O11	1000				AMG-232	CT-AMG232	ChemieTek	DMSO	O21	100
	Alvocidib	S1230	Selleck	DMSO	B12	100				AMG-232	CT-AMG232	ChemieTek	DMSO	B22	10
	Alvocidib	S1230	Selleck	DMSO	D12	10				AMG-232	CT-AMG232	ChemieTek	DMSO	C22	1
	Alvocidib	S1230	Selleck	DMSO	E12	1				AMG-232	CT-AMG232	ChemieTek	DMSO	D22	0.1
	Anagrelide	2432	Tocris Biosciences	DMSO	G2	10000				AZD0156	CT-A0156	Chemietek	DMSO	F23	1000
	Anagrelide	2432	Tocris Biosciences	DMSO	H2	1000				AZD0156	CT-A0156	Chemietek	DMSO	G23	100
	Anagrelide	2432	Tocris Biosciences	DMSO	I2	100				AZD0156	CT-A0156	Chemietek	DMSO	H23	10
	Anagrelide	2432	Tocris Biosciences	DMSO	J2	10				AZD0156	CT-A0156	Chemietek	DMSO	I23	1
	Anagrelide	2432	Tocris Biosciences	DMSO	K2	1				AZD0156	CT-A0156	Chemietek	DMSO	J23	0.1
	Axitinib	A-1107	LC Laboratories	DMSO	B18	10000				AZD-8186	A-1610	Active Biochem	DMSO	I16	1000
	Axitinib	A-1107	LC Laboratories	DMSO	C18	1000				AZD-8186	A-1610	Active Biochem	DMSO	J16	100
	Axitinib	A-1107	LC Laboratories	DMSO	D18	100				AZD-8186	A-1610	Active Biochem	DMSO	K16	10
	Axitinib	A-1107	LC Laboratories	DMSO	E18	10				AZD-8186	A-1610	Active Biochem	DMSO	L16	1
	Axitinib	A-1107	LC Laboratories	DMSO	F18	1				AZD-8186	A-1610	Active Biochem	DMSO	M16	0.1
	Azacitidine	NSC 102816-P/21	National Cancer Institute	DMSO	E22	10000				BGB324	HY-15150	Medchem Express	DMSO	C21	10000
	Azacitidine	NSC 102816-P/21	National Cancer Institute	DMSO	F22	1000				BGB324	HY-15150	Medchem Express	DMSO	D21	1000
	Azacitidine	NSC 102816-P/21	National Cancer Institute	DMSO	G22	100				BGB324	HY-15150	Medchem Express	DMSO	E21	100
	Azacitidine	NSC 102816-P/21	National Cancer Institute	DMSO	H22	10				BGB324	HY-15150	Medchem Express	DMSO	F21	10
	Azacitidine	NSC 102816-P/21	National Cancer Institute	DMSO	I22	1				BGB324	HY-15150	Medchem Express	DMSO	G21	1
	AZD1152-HQPA	CT-A1152H	ChemieTek	DMSO	G13	1000				Birabresib	S7360	Selleck	DMSO	G18	10000
	AZD1152-HQPA	CT-A1152H	ChemieTek	DMSO	H13	100				Birabresib	S7360	Selleck	DMSO	H18	1000
	AZD1152-HQPA	CT-A1152H	ChemieTek	DMSO	I13	10				Birabresib	S7360	Selleck	DMSO	I18	100
	AZD1152-HQPA	CT-A1152H	ChemieTek	DMSO	J13	1				Birabresib	S7360	Selleck	DMSO	J18	10
	AZD1152-HQPA	CT-A1152H	ChemieTek	DMSO	K13	0.1				Birabresib	S7360	Selleck	DMSO	K18	1
	AZD-1775	Axon 1494	Axon Medchem	DMSO	B13	10000				Birinapant	CT-BIRI	Chemietek	DMSO	G8	1000
	AZD-1775	Axon 1494	Axon Medchem	DMSO	C13	1000				Birinapant	CT-BIRI	Chemietek	DMSO	H8	100
	AZD-1775	Axon 1494	Axon Medchem	DMSO	D13	100				Birinapant	CT-BIRI	Chemietek	DMSO	J8	10
	AZD-1775	Axon 1494	Axon Medchem	DMSO	E13	10				Birinapant	CT-BIRI	Chemietek	DMSO	K8	1
	AZD-1775	Axon 1494	Axon Medchem	DMSO	F13	1				Birinapant	CT-BIRI	Chemietek	DMSO	L8	0.1
	Belinostat	CT-BELI	ChemieTek	DMSO	L13	10000				BRD7116	HY-18714	Medchemexpress	DMSO	H11	10000
	Belinostat	CT-BELI	ChemieTek	DMSO	M13	1000				BRD7116	HY-18714	Medchemexpress	DMSO	I11	1000
	Belinostat	CT-BELI	ChemieTek	DMSO	N13	100				BRD7116	HY-18714	Medchemexpress	DMSO	J11	100
	Belinostat	CT-BELI	ChemieTek	DMSO	B14	10				BRD7116	HY-18714	Medchemexpress	DMSO	K11	10
	Belinostat	CT-BELI	ChemieTek	DMSO	C14	1				BRD7116	HY-18714	Medchemexpress	DMSO	L11	1
	Bortezomib	CT-BZ001	ChemieTek	DMSO	I4	1000				Benzethonium Chloride	B8879	Sigma-Aldrich	DMSO	A2	100000
	Bortezomib	CT-BZ001	ChemieTek	DMSO	J4	100				Benzethonium Chloride	B8879	Sigma-Aldrich	DMSO	M4	100000
	Bortezomib	CT-BZ001	ChemieTek	DMSO	K4	10				Benzethonium Chloride	B8879	Sigma-Aldrich	DMSO	G6	100000
	Bortezomib	CT-BZ001	ChemieTek	DMSO	L4	1				Benzethonium Chloride	B8879	Sigma-Aldrich	DMSO	F10	100000
	Bortezomib	CT-BZ001	ChemieTek	DMSO	N4	0.1				Benzethonium Chloride	B8879	Sigma-Aldrich	DMSO	N11	100000
	Bosutinib	B-1788	LC Laboratories	DMSO	G18	10000				Benzethonium Chloride	B8879	Sigma-Aldrich	DMSO	J14	100000
	Bosutinib	B-1788	LC Laboratories	DMSO	H18	1000				Benzethonium Chloride	B8879	Sigma-Aldrich	DMSO	B16	100000
	Bosutinib	B-1788	LC Laboratories	DMSO	I18	100				Benzethonium Chloride	B8879	Sigma-Aldrich	DMSO	O18	100000
	Bosutinib	B-1788	LC Laboratories	DMSO	J18	10				Benzethonium Chloride	B8879	Sigma-Aldrich	DMSO	K21	100000
	Bosutinib	B-1788	LC Laboratories	DMSO	K18	1				Benzethonium Chloride	B8879	Sigma-Aldrich	DMSO	A23	100000
	Benzethonium Chloride	B8879	Sigma-Aldrich	DMSO	A2	100000				Benzethonium Chloride	B8879	Sigma-Aldrich	DMSO	A24	100000
	Benzethonium Chloride	B8879	Sigma-Aldrich	DMSO	M4	100000				Benzethonium Chloride	B8879	Sigma-Aldrich	DMSO	C24	100000
	Benzethonium Chloride	B8879	Sigma-Aldrich	DMSO	G6	100000				Ceritinib	S7083	Selleck	DMSO	I14	2500
	Benzethonium Chloride	B8879	Sigma-Aldrich	DMSO	F10	100000				Ceritinib	S7083	Selleck	DMSO	K14	250
	Benzethonium Chloride	B8879	Sigma-Aldrich	DMSO	N11	100000				Ceritinib	S7083	Selleck	DMSO	L14	25
	Benzethonium Chloride	B8879	Sigma-Aldrich	DMSO	J14	100000				Ceritinib	S7083	Selleck	DMSO	M14	2.5
	Benzethonium Chloride	B8879	Sigma-Aldrich	DMSO	B16	100000				Ceritinib	S7083	Selleck	DMSO	N14	0.25
	Benzethonium Chloride	B8879	Sigma-Aldrich	DMSO	O18	100000				Chloroquine	C6628	Sigma-Aldrich	AQ	G2	100000
	Benzethonium Chloride	B8879	Sigma-Aldrich	DMSO	K21	100000				Chloroquine	C6628	Sigma-Aldrich	AQ	H2	10000
	Benzethonium Chloride	B8879	Sigma-Aldrich	DMSO	A23	100000				Chloroquine	C6628	Sigma-Aldrich	AQ	I2	1000
	Benzethonium Chloride	B8879	Sigma-Aldrich	DMSO	A24	100000				Chloroquine	C6628	Sigma-Aldrich	AQ	J2	100
	Benzethonium Chloride	B8879	Sigma-Aldrich	DMSO	B24	100000				Chloroquine	C6628	Sigma-Aldrich	AQ	K2	10
	Carfilzomib	CT-CARF	ChemieTek	DMSO	F23	1000				Cobimetinib	HY-13064	Medchemexpress	DMSO	G20	1000
	Carfilzomib	CT-CARF	ChemieTek	DMSO	G23	100				Cobimetinib	HY-13064	Medchemexpress	DMSO	H20	100
	Carfilzomib	CT-CARF	ChemieTek	DMSO	H23	10				Cobimetinib	HY-13064	Medchemexpress	DMSO	I20	10
	Carfilzomib	CT-CARF	ChemieTek	DMSO	I23	1				Cobimetinib	HY-13064	Medchemexpress	DMSO	J20	1
	Carfilzomib	CT-CARF	ChemieTek	DMSO	J23	0.1				Cobimetinib	HY-13064	Medchemexpress	DMSO	K20	0.1
	Celecoxib	NSC 719627-M/1	National Cancer Institute	DMSO	O4	10000				CPI-613	S2776	Selleck	DMSO	E9	10000
	Celecoxib	NSC 719627-M/1	National Cancer Institute	DMSO	B5	1000				CPI-613	S2776	Selleck	DMSO	F9	1000
	Celecoxib	NSC 719627-M/1	National Cancer Institute	DMSO	C5	100				CPI-613	S2776	Selleck	DMSO	G9	100
	Celecoxib	NSC 719627-M/1	National Cancer Institute	DMSO	E5	10				CPI-613	S2776	Selleck	DMSO	H9	10
	Celecoxib	NSC 719627-M/1	National Cancer Institute	DMSO	F5	1				CPI-613	S2776	Selleck	DMSO	I9	1
	Clofarabine	NSC 606869-X/4	National Cancer Institute	DMSO	G5	10000				Crenolanib	S2730	Selleck	DMSO	B8	10000
	Clofarabine	NSC 606869-X/4	National Cancer Institute	DMSO	H5	1000				Crenolanib	S2730	Selleck	DMSO	C8	1000
	Clofarabine	NSC 606869-X/4	National Cancer Institute	DMSO	I5	100				Crenolanib	S2730	Selleck	DMSO	D8	100
	Clofarabine	NSC 606869-X/4	National Cancer Institute	DMSO	J5	10				Crenolanib	S2730	Selleck	DMSO	E8	10
	Clofarabine	NSC 606869-X/4	National Cancer Institute	DMSO	K5	1				Crenolanib	S2730	Selleck	DMSO	F8	1
	Copanlisib	S2802-2	Selleck	DMSO	L10	1000				Dinaciclib	CT-DINA	ChemieTek	DMSO	E7	1000
	Copanlisib	S2802-2	Selleck	DMSO	M10	100				Dinaciclib	CT-DINA	ChemieTek	DMSO	F7	100
	Copanlisib	S2802-2	Selleck	DMSO	N10	10				Dinaciclib	CT-DINA	ChemieTek	DMSO	G7	10
	Copanlisib	S2802-2	Selleck	DMSO	O10	1				Dinaciclib	CT-DINA	ChemieTek	DMSO	H7	1
	Copanlisib	S2802-2	Selleck	DMSO	B11	0.1				Dinaciclib	CT-DINA	ChemieTek	DMSO	I7	0.1
	Cytarabine	NSC 63878-P/19	National Cancer Institute	DMSO	C6	10000				DMSO	34869	Merck	DMSO	P3	0
	Cytarabine	NSC 63878-P/19	National Cancer Institute	DMSO	D6	1000				DMSO	34869	Merck	DMSO	D5	0
	Cytarabine	NSC 63878-P/19	National Cancer Institute	DMSO	E6	100				DMSO	34869	Merck	DMSO	N7	0
	Cytarabine	NSC 63878-P/19	National Cancer Institute	DMSO	F6	10				DMSO	34869	Merck	DMSO	I8	0
	Cytarabine	NSC 63878-P/19	National Cancer Institute	DMSO	H6	1				DMSO	34869	Merck	DMSO	B9	0
	Cytarabine/Idarubicin	combo		DMSO	I6	5000 /500				DMSO	34869	Merck	DMSO	C12	0
	Cytarabine/Idarubicin	combo		DMSO	J6	500 /50				DMSO	34869	Merck	DMSO	O13	0
	Cytarabine/Idarubicin	combo		DMSO	K6	50 /5				DMSO	34869	Merck	DMSO	E15	0
	Cytarabine/Idarubicin	combo		DMSO	L6	5 /0,5				DMSO	34869	Merck	DMSO	L17	0
	Cytarabine/Idarubicin	combo		DMSO	M6	0,5/0,05				DMSO	34869	Merck	DMSO	H19	0
	Dasatinib	D-3307	LC Laboratories	DMSO	J17	1000				DMSO	34869	Merck	DMSO	C20	0
	Dasatinib	D-3307	LC Laboratories	DMSO	K17	100				DMSO	34869	Merck	DMSO	P22	0
	Dasatinib	D-3307	LC Laboratories	DMSO	M17	10				Duvelisib	S7028	Selleck	DMSO	G13	500
	Dasatinib	D-3307	LC Laboratories	DMSO	N17	1				Duvelisib	S7028	Selleck	DMSO	H13	50
	Dasatinib	D-3307	LC Laboratories	DMSO	O17	0.1				Duvelisib	S7028	Selleck	DMSO	I13	5
	Dexamethasone	S1322	Selleck	DMSO	M3	10000				Duvelisib	S7028	Selleck	DMSO	J13	0.5
	Dexamethasone	S1322	Selleck	DMSO	N3	1000				Duvelisib	S7028	Selleck	DMSO	K13	0.05
	Dexamethasone	S1322	Selleck	DMSO	O3	100				Entospletinib	S7523	Selleck	DMSO	H21	5000
	Dexamethasone	S1322	Selleck	DMSO	B4	10				Entospletinib	S7523	Selleck	DMSO	I21	500
	Dexamethasone	S1322	Selleck	DMSO	C4	1				Entospletinib	S7523	Selleck	DMSO	J21	50
	DMSO	34869	Merck	DMSO	P3	0				Entospletinib	S7523	Selleck	DMSO	L21	5
	DMSO	34869	Merck	DMSO	D5	0				Entospletinib	S7523	Selleck	DMSO	M21	0.5
	DMSO	34869	Merck	DMSO	N7	0				EPZ-5676	S7062	Selleck	DMSO	J17	1000
	DMSO	34869	Merck	DMSO	I8	0				EPZ-5676	S7062	Selleck	DMSO	K17	100
	DMSO	34869	Merck	DMSO	B9	0				EPZ-5676	S7062	Selleck	DMSO	M17	10
	DMSO	34869	Merck	DMSO	C12	0				EPZ-5676	S7062	Selleck	DMSO	N17	1
	DMSO	34869	Merck	DMSO	O13	0				EPZ-5676	S7062	Selleck	DMSO	O17	0.1
	DMSO	34869	Merck	DMSO	E15	0				FG-4592	HY-13426	Medchemexpress	DMSO	J9	10000
	DMSO	34869	Merck	DMSO	L17	0				FG-4592	HY-13426	Medchemexpress	DMSO	K9	1000
	DMSO	34869	Merck	DMSO	H19	0				FG-4592	HY-13426	Medchemexpress	DMSO	L9	100
	DMSO	34869	Merck	DMSO	C20	0				FG-4592	HY-13426	Medchemexpress	DMSO	M9	10
	DMSO	34869	Merck	DMSO	P22	0				FG-4592	HY-13426	Medchemexpress	DMSO	N9	1
	Erlotinib	NSC 718781-R/4	National Cancer Institute	DMSO	H3	10000				Filanesib	HY-15187	Medchemexpress	DMSO	O19	1000
	Erlotinib	NSC 718781-R/4	National Cancer Institute	DMSO	I3	1000				Filanesib	HY-15187	Medchemexpress	DMSO	B20	100
	Erlotinib	NSC 718781-R/4	National Cancer Institute	DMSO	J3	100				Filanesib	HY-15187	Medchemexpress	DMSO	D20	10
	Erlotinib	NSC 718781-R/4	National Cancer Institute	DMSO	K3	10				Filanesib	HY-15187	Medchemexpress	DMSO	E20	1
	Erlotinib	NSC 718781-R/4	National Cancer Institute	DMSO	L3	1				Filanesib	HY-15187	Medchemexpress	DMSO	F20	0.1
	Etoposide	NSC 141540-H/184	National Cancer Institute	DMSO	H21	10000				Galunisertib	S2230	Selleck	DMSO	M3	1000
	Etoposide	NSC 141540-H/184	National Cancer Institute	DMSO	I21	1000				Galunisertib	S2230	Selleck	DMSO	N3	100
	Etoposide	NSC 141540-H/184	National Cancer Institute	DMSO	J21	100				Galunisertib	S2230	Selleck	DMSO	O3	10
	Etoposide	NSC 141540-H/184	National Cancer Institute	DMSO	L21	10				Galunisertib	S2230	Selleck	DMSO	B4	1
	Etoposide	NSC 141540-H/184	National Cancer Institute	DMSO	M21	1				Galunisertib	S2230	Selleck	DMSO	C4	0.1
	Everolimus	E-4040	LC Laboratories	DMSO	G15	100				Gedatolisib	S2628	Selleck	DMSO	G15	1000
	Everolimus	E-4040	LC Laboratories	DMSO	H15	10				Gedatolisib	S2628	Selleck	DMSO	H15	100
	Everolimus	E-4040	LC Laboratories	DMSO	I15	1				Gedatolisib	S2628	Selleck	DMSO	I15	10
	Everolimus	E-4040	LC Laboratories	DMSO	J15	0.1				Gedatolisib	S2628	Selleck	DMSO	J15	1
	Everolimus	E-4040	LC Laboratories	DMSO	K15	0.01				Gedatolisib	S2628	Selleck	DMSO	K15	0.1
	Fludarabine	NSC 312887-C/7	National Cancer Institute	DMSO	J22	10000				Glasdegib	HY-16391	Medchemexpress	DMSO	O22	1000
	Fludarabine	NSC 312887-C/7	National Cancer Institute	DMSO	K22	1000				Glasdegib	HY-16391	Medchemexpress	DMSO	B23	100
	Fludarabine	NSC 312887-C/7	National Cancer Institute	DMSO	L22	100				Glasdegib	HY-16391	Medchemexpress	DMSO	C23	10
	Fludarabine	NSC 312887-C/7	National Cancer Institute	DMSO	M22	10				Glasdegib	HY-16391	Medchemexpress	DMSO	D23	1
	Fludarabine	NSC 312887-C/7	National Cancer Institute	DMSO	N22	1				Glasdegib	HY-16391	Medchemexpress	DMSO	E23	0.1
	Gemcitabine	NSC 613327-S/2	National Cancer Institute	DMSO	C21	1000				GSK2879552	CT-GSK287-2	Chemietek	DMSO	L15	100000
	Gemcitabine	NSC 613327-S/2	National Cancer Institute	DMSO	D21	100				GSK2879552	CT-GSK287-2	Chemietek	DMSO	M15	10000
	Gemcitabine	NSC 613327-S/2	National Cancer Institute	DMSO	E21	10				GSK2879552	CT-GSK287-2	Chemietek	DMSO	N15	1000
	Gemcitabine	NSC 613327-S/2	National Cancer Institute	DMSO	F21	1				GSK2879552	CT-GSK287-2	Chemietek	DMSO	O15	100
	Gemcitabine	NSC 613327-S/2	National Cancer Institute	DMSO	G21	0.1				GSK2879552	CT-GSK287-2	Chemietek	DMSO	C16	10
	Hydroxyurea	H8627	Sigma-Aldrich	DMSO	E9	100000				GSK525762	CT-BET762	ChemieTek	DMSO	E22	10000
	Hydroxyurea	H8627	Sigma-Aldrich	DMSO	F9	10000				GSK525762	CT-BET762	ChemieTek	DMSO	F22	1000
	Hydroxyurea	H8627	Sigma-Aldrich	DMSO	G9	1000				GSK525762	CT-BET762	ChemieTek	DMSO	G22	100
	Hydroxyurea	H8627	Sigma-Aldrich	DMSO	H9	100				GSK525762	CT-BET762	ChemieTek	DMSO	H22	10
	Hydroxyurea	H8627	Sigma-Aldrich	DMSO	I9	10				GSK525762	CT-BET762	ChemieTek	DMSO	I22	1
	Idarubicin	I1656	Sigma-Aldrich	DMSO	C3	1000				Hydroxyfasudil	sc-202176	Santa Cruz Biotechnology	DMSO	O14	37500
	Idarubicin	I1656	Sigma-Aldrich	DMSO	D3	100				Hydroxyfasudil	sc-202176	Santa Cruz Biotechnology	DMSO	B15	3750
	Idarubicin	I1656	Sigma-Aldrich	DMSO	E3	10				Hydroxyfasudil	sc-202176	Santa Cruz Biotechnology	DMSO	C15	375
	Idarubicin	I1656	Sigma-Aldrich	DMSO	F3	1				Hydroxyfasudil	sc-202176	Santa Cruz Biotechnology	DMSO	D15	37.5
	Idarubicin	I1656	Sigma-Aldrich	DMSO	G3	0.1				Hydroxyfasudil	sc-202176	Santa Cruz Biotechnology	DMSO	F15	3.75
	Idelalisib	CT-CAL101	ChemieTek	DMSO	I14	10000				Ibrutinib	S2680	Selleck	DMSO	L5	1000
	Idelalisib	CT-CAL101	ChemieTek	DMSO	K14	1000				Ibrutinib	S2680	Selleck	DMSO	M5	100
	Idelalisib	CT-CAL101	ChemieTek	DMSO	L14	100				Ibrutinib	S2680	Selleck	DMSO	N5	10
	Idelalisib	CT-CAL101	ChemieTek	DMSO	M14	10				Ibrutinib	S2680	Selleck	DMSO	O5	1
	Idelalisib	CT-CAL101	ChemieTek	DMSO	N14	1				Ibrutinib	S2680	Selleck	DMSO	B6	0.1
	Imatinib	C-5508	LC Laboratories	DMSO	L2	10000				Idasanutlin	HY-15676	Medchemexpress	DMSO	J19	10000
	Imatinib	C-5508	LC Laboratories	DMSO	M2	1000				Idasanutlin	HY-15676	Medchemexpress	DMSO	K19	1000
	Imatinib	C-5508	LC Laboratories	DMSO	N2	100				Idasanutlin	HY-15676	Medchemexpress	DMSO	L19	100
	Imatinib	C-5508	LC Laboratories	DMSO	O2	10				Idasanutlin	HY-15676	Medchemexpress	DMSO	M19	10
	Imatinib	C-5508	LC Laboratories	DMSO	B3	1				Idasanutlin	HY-15676	Medchemexpress	DMSO	N19	1
	Lenalidomide	L-5499	LC Laboratories	DMSO	L18	100000				Ipatasertib	CT-G0068	Chemietek	DMSO	L10	10000
	Lenalidomide	L-5499	LC Laboratories	DMSO	M18	10000				Ipatasertib	CT-G0068	Chemietek	DMSO	M10	1000
	Lenalidomide	L-5499	LC Laboratories	DMSO	N18	1000				Ipatasertib	CT-G0068	Chemietek	DMSO	N10	100
	Lenalidomide	L-5499	LC Laboratories	DMSO	B19	100				Ipatasertib	CT-G0068	Chemietek	DMSO	O10	10
	Lenalidomide	L-5499	LC Laboratories	DMSO	C19	10				Ipatasertib	CT-G0068	Chemietek	DMSO	B11	1
	Mepacrine	Q3251	Sigma-Aldrich	AQ	B8	50000				Larotrectinib	HY-12866	Medchemexpress	DMSO	B13	1000
	Mepacrine	Q3251	Sigma-Aldrich	AQ	C8	5000				Larotrectinib	HY-12866	Medchemexpress	DMSO	C13	100
	Mepacrine	Q3251	Sigma-Aldrich	AQ	D8	500				Larotrectinib	HY-12866	Medchemexpress	DMSO	D13	10
	Mepacrine	Q3251	Sigma-Aldrich	AQ	E8	50				Larotrectinib	HY-12866	Medchemexpress	DMSO	E13	1
	Mepacrine	Q3251	Sigma-Aldrich	AQ	F8	5				Larotrectinib	HY-12866	Medchemexpress	DMSO	F13	0.1
	Metformin	2864	Tocris	AQ	B2	100000				LCL161	CT-LCL161	Chemietek	DMSO	N16	25000
	Metformin	2864	Tocris	AQ	C2	10000				LCL161	CT-LCL161	Chemietek	DMSO	O16	2500
	Metformin	2864	Tocris	AQ	D2	1000				LCL161	CT-LCL161	Chemietek	DMSO	B17	250
	Metformin	2864	Tocris	AQ	E2	100				LCL161	CT-LCL161	Chemietek	DMSO	C17	25
	Metformin	2864	Tocris	AQ	F2	10				LCL161	CT-LCL161	Chemietek	DMSO	D17	2.5
	Methotrexate	S1210	Selleck	DMSO	M8	5000				MK-0752	S2660	Selleck	DMSO	G5	1000
	Methotrexate	S1210	Selleck	DMSO	N8	500				MK-0752	S2660	Selleck	DMSO	H5	100
	Methotrexate	S1210	Selleck	DMSO	O8	50				MK-0752	S2660	Selleck	DMSO	I5	10
	Methotrexate	S1210	Selleck	DMSO	C9	5				MK-0752	S2660	Selleck	DMSO	J5	1
	Methotrexate	S1210	Selleck	DMSO	D9	0.5				MK-0752	S2660	Selleck	DMSO	K5	0.1
	Methylprednisolone	sc-205749	Santa Cruz Biotechnology	DMSO	N6	10000				MLN-0128	CT-INK128	Chemietek	DMSO	N6	1000
	Methylprednisolone	sc-205749	Santa Cruz Biotechnology	DMSO	O6	1000				MLN-0128	CT-INK128	Chemietek	DMSO	O6	100
	Methylprednisolone	sc-205749	Santa Cruz Biotechnology	DMSO	B7	100				MLN-0128	CT-INK128	Chemietek	DMSO	B7	10
	Methylprednisolone	sc-205749	Santa Cruz Biotechnology	DMSO	C7	10				MLN-0128	CT-INK128	Chemietek	DMSO	C7	1
	Methylprednisolone	sc-205749	Santa Cruz Biotechnology	DMSO	D7	1				MLN-0128	CT-INK128	Chemietek	DMSO	D7	0.1
	Midostaurin	2992	Tocris Biosciences	DMSO	K23	10000				Momelotinib	CT-CYT387	Chemietek	DMSO	I6	10000
	Midostaurin	2992	Tocris Biosciences	DMSO	L23	1000				Momelotinib	CT-CYT387	Chemietek	DMSO	J6	1000
	Midostaurin	2992	Tocris Biosciences	DMSO	M23	100				Momelotinib	CT-CYT387	Chemietek	DMSO	K6	100
	Midostaurin	2992	Tocris Biosciences	DMSO	N23	10				Momelotinib	CT-CYT387	Chemietek	DMSO	L6	10
	Midostaurin	2992	Tocris Biosciences	DMSO	O23	1				Momelotinib	CT-CYT387	Chemietek	DMSO	M6	1
	Mitoxantrone	NSC 279836-C/2	NCI	DMSO	E7	1000				Nintedanib	S1010-2	Selleck	DMSO	D4	10000
	Mitoxantrone	NSC 279836-C/2	NCI	DMSO	F7	100				Nintedanib	S1010-2	Selleck	DMSO	E4	1000
	Mitoxantrone	NSC 279836-C/2	NCI	DMSO	G7	10				Nintedanib	S1010-2	Selleck	DMSO	F4	100
	Mitoxantrone	NSC 279836-C/2	NCI	DMSO	H7	1				Nintedanib	S1010-2	Selleck	DMSO	G4	10
	Mitoxantrone	NSC 279836-C/2	NCI	DMSO	I7	0.1				Nintedanib	S1010-2	Selleck	DMSO	H4	1
	Navitoclax	S1001-2	Selleck	DMSO	G10	10000				NVP-BGJ398	CT-BGJ398	Chemietek	DMSO	C6	1000
	Navitoclax	S1001-2	Selleck	DMSO	H10	1000				NVP-BGJ398	CT-BGJ398	Chemietek	DMSO	D6	100
	Navitoclax	S1001-2	Selleck	DMSO	I10	100				NVP-BGJ398	CT-BGJ398	Chemietek	DMSO	E6	10
	Navitoclax	S1001-2	Selleck	DMSO	J10	10				NVP-BGJ398	CT-BGJ398	Chemietek	DMSO	F6	1
	Navitoclax	S1001-2	Selleck	DMSO	K10	1				NVP-BGJ398	CT-BGJ398	Chemietek	DMSO	H6	0.1
	Nilotinib	N-8207	LC Laboratories	DMSO	I16	10000				NVP-PIM447	HY-19322B	Medchemexpress	DMSO	L18	10000
	Nilotinib	N-8207	LC Laboratories	DMSO	J16	1000				NVP-PIM447	HY-19322B	Medchemexpress	DMSO	M18	1000
	Nilotinib	N-8207	LC Laboratories	DMSO	K16	100				NVP-PIM447	HY-19322B	Medchemexpress	DMSO	N18	100
	Nilotinib	N-8207	LC Laboratories	DMSO	L16	10				NVP-PIM447	HY-19322B	Medchemexpress	DMSO	B19	10
	Nilotinib	N-8207	LC Laboratories	DMSO	M16	1				NVP-PIM447	HY-19322B	Medchemexpress	DMSO	C19	1
	Olaparib	O-9201	LC Laboratories	DMSO	O19	10000				NVP-SHP099	HY-100388A	Medchem Express	DMSO	K12	1000
	Olaparib	O-9201	LC Laboratories	DMSO	B20	1000				NVP-SHP099	HY-100388A	Medchem Express	DMSO	L12	100
	Olaparib	O-9201	LC Laboratories	DMSO	D20	100				NVP-SHP099	HY-100388A	Medchem Express	DMSO	M12	10
	Olaparib	O-9201	LC Laboratories	DMSO	E20	10				NVP-SHP099	HY-100388A	Medchem Express	DMSO	N12	1
	Olaparib	O-9201	LC Laboratories	DMSO	F20	1				NVP-SHP099	HY-100388A	Medchem Express	DMSO	O12	0.1
	Onalespib	HY-14463	Medchemexpress	DMSO	N16	2500				Omacetaxine	sc-202652	Santa Cruz Biotechnology	DMSO	H3	10000
	Onalespib	HY-14463	Medchemexpress	DMSO	O16	250				Omacetaxine	sc-202652	Santa Cruz Biotechnology	DMSO	I3	1000
	Onalespib	HY-14463	Medchemexpress	DMSO	B17	25				Omacetaxine	sc-202652	Santa Cruz Biotechnology	DMSO	J3	100
	Onalespib	HY-14463	Medchemexpress	DMSO	C17	2.5				Omacetaxine	sc-202652	Santa Cruz Biotechnology	DMSO	K3	10
	Onalespib	HY-14463	Medchemexpress	DMSO	D17	0.25				Omacetaxine	sc-202652	Santa Cruz Biotechnology	DMSO	L3	1
	Paclitaxel	NSC 125973-L/68	National Cancer Institute	DMSO	J7	1000				Pacritinib	S8057	Selleck	DMSO	D19	10000
	Paclitaxel	NSC 125973-L/68	National Cancer Institute	DMSO	K7	100				Pacritinib	S8057	Selleck	DMSO	E19	1000
	Paclitaxel	NSC 125973-L/68	National Cancer Institute	DMSO	L7	10				Pacritinib	S8057	Selleck	DMSO	F19	100
	Paclitaxel	NSC 125973-L/68	National Cancer Institute	DMSO	M7	1				Pacritinib	S8057	Selleck	DMSO	G19	10
	Paclitaxel	NSC 125973-L/68	National Cancer Institute	DMSO	O7	0.1				Pacritinib	S8057	Selleck	DMSO	I19	1
	Palbociclib	S1116	Selleck	DMSO	O9	10000				Pevonedistat	CT-M4924	ChemieTek	DMSO	O9	10000
	Palbociclib	S1116	Selleck	DMSO	B10	1000				Pevonedistat	CT-M4924	ChemieTek	DMSO	B10	1000
	Palbociclib	S1116	Selleck	DMSO	C10	100				Pevonedistat	CT-M4924	ChemieTek	DMSO	C10	100
	Palbociclib	S1116	Selleck	DMSO	D10	10				Pevonedistat	CT-M4924	ChemieTek	DMSO	D10	10
	Palbociclib	S1116	Selleck	DMSO	E10	1				Pevonedistat	CT-M4924	ChemieTek	DMSO	E10	1
	Panobinostat	P-3703	LC Laboratories	DMSO	D19	1000				Pomalidomide	S1567	Selleck	DMSO	F12	10000
	Panobinostat	P-3703	LC Laboratories	DMSO	E19	100				Pomalidomide	S1567	Selleck	DMSO	G12	1000
	Panobinostat	P-3703	LC Laboratories	DMSO	F19	10				Pomalidomide	S1567	Selleck	DMSO	H12	100
	Panobinostat	P-3703	LC Laboratories	DMSO	G19	1				Pomalidomide	S1567	Selleck	DMSO	I12	10
	Panobinostat	P-3703	LC Laboratories	DMSO	I19	0.1				Pomalidomide	S1567	Selleck	DMSO	J12	1
	Ponatinib	S1490	Selleck	DMSO	K12	1000				PTC-209	S7539	Selleck	DMSO	I4	10000
	Ponatinib	S1490	Selleck	DMSO	L12	100				PTC-209	S7539	Selleck	DMSO	J4	1000
	Ponatinib	S1490	Selleck	DMSO	M12	10				PTC-209	S7539	Selleck	DMSO	K4	100
	Ponatinib	S1490	Selleck	DMSO	N12	1				PTC-209	S7539	Selleck	DMSO	L4	10
	Ponatinib	S1490	Selleck	DMSO	O12	0.1				PTC-209	S7539	Selleck	DMSO	N4	1
	Pravastatin	2318	Tocris	AQ	J9	10000				Ralimetinib	S1494	Selleck	DMSO	J7	10000
	Pravastatin	2318	Tocris	AQ	K9	1000				Ralimetinib	S1494	Selleck	DMSO	K7	1000
	Pravastatin	2318	Tocris	AQ	L9	100				Ralimetinib	S1494	Selleck	DMSO	L7	100
	Pravastatin	2318	Tocris	AQ	M9	10				Ralimetinib	S1494	Selleck	DMSO	M7	10
	Pravastatin	2318	Tocris	AQ	N9	1				Ralimetinib	S1494	Selleck	DMSO	O7	1
	Quizartinib	CT-AC220	ChemieTek	DMSO	O22	1000				Regorafenib	S1178	Selleck	DMSO	B2	10000
	Quizartinib	CT-AC220	ChemieTek	DMSO	B23	100				Regorafenib	S1178	Selleck	DMSO	C2	1000
	Quizartinib	CT-AC220	ChemieTek	DMSO	C23	10				Regorafenib	S1178	Selleck	DMSO	D2	100
	Quizartinib	CT-AC220	ChemieTek	DMSO	D23	1				Regorafenib	S1178	Selleck	DMSO	E2	10
	Quizartinib	CT-AC220	ChemieTek	DMSO	E23	0.1				Regorafenib	S1178	Selleck	DMSO	F2	1
	Rucaparib	S1098	Selleck	DMSO	D14	10000				Rocilinostat	CT-ACY12	Chemietek	DMSO	C11	10000
	Rucaparib	S1098	Selleck	DMSO	E14	1000				Rocilinostat	CT-ACY12	Chemietek	DMSO	D11	1000
	Rucaparib	S1098	Selleck	DMSO	F14	100				Rocilinostat	CT-ACY12	Chemietek	DMSO	E11	100
	Rucaparib	S1098	Selleck	DMSO	G14	10				Rocilinostat	CT-ACY12	Chemietek	DMSO	F11	10
	Rucaparib	S1098	Selleck	DMSO	H14	1				Rocilinostat	CT-ACY12	Chemietek	DMSO	G11	1
	Ruxolitinib	CT-INCB	ChemieTek	DMSO	L15	10000				SCH772984	CT-SCH772	ChemieTek	DMSO	L13	10000
	Ruxolitinib	CT-INCB	ChemieTek	DMSO	M15	1000				SCH772984	CT-SCH772	ChemieTek	DMSO	M13	1000
	Ruxolitinib	CT-INCB	ChemieTek	DMSO	N15	100				SCH772984	CT-SCH772	ChemieTek	DMSO	N13	100
	Ruxolitinib	CT-INCB	ChemieTek	DMSO	O15	10				SCH772984	CT-SCH772	ChemieTek	DMSO	B14	10
	Ruxolitinib	CT-INCB	ChemieTek	DMSO	C16	1				SCH772984	CT-SCH772	ChemieTek	DMSO	C14	1
	Sorafenib	S-8502	LC Laboratories	DMSO	L20	1000				Selinexor	S7252	Selleck	DMSO	B18	10000
	Sorafenib	S-8502	LC Laboratories	DMSO	M20	100				Selinexor	S7252	Selleck	DMSO	C18	1000
	Sorafenib	S-8502	LC Laboratories	DMSO	N20	10				Selinexor	S7252	Selleck	DMSO	D18	100
	Sorafenib	S-8502	LC Laboratories	DMSO	O20	1				Selinexor	S7252	Selleck	DMSO	E18	10
	Sorafenib	S-8502	LC Laboratories	DMSO	B21	0.1				Selinexor	S7252	Selleck	DMSO	F18	1
	Sunitinib	S-8803	LC Labs	DMSO	N21	1000				Silmitasertib	S2248	Selleck	DMSO	D16	10000
	Sunitinib	S-8803	LC Labs	DMSO	O21	100				Silmitasertib	S2248	Selleck	DMSO	E16	1000
	Sunitinib	S-8803	LC Labs	DMSO	B22	10				Silmitasertib	S2248	Selleck	DMSO	F16	100
	Sunitinib	S-8803	LC Labs	DMSO	C22	1				Silmitasertib	S2248	Selleck	DMSO	G16	10
	Sunitinib	S-8803	LC Labs	DMSO	D22	0.1				Silmitasertib	S2248	Selleck	DMSO	H16	1
	Tipifarnib	S1453	Selleck	DMSO	F12	10000				Taselisib	HY-13898-2	Medchemexpress	DMSO	J22	1000
	Tipifarnib	S1453	Selleck	DMSO	G12	1000				Taselisib	HY-13898-2	Medchemexpress	DMSO	K22	100
	Tipifarnib	S1453	Selleck	DMSO	H12	100				Taselisib	HY-13898-2	Medchemexpress	DMSO	L22	10
	Tipifarnib	S1453	Selleck	DMSO	I12	10				Taselisib	HY-13898-2	Medchemexpress	DMSO	M22	1
	Tipifarnib	S1453	Selleck	DMSO	J12	1				Taselisib	HY-13898-2	Medchemexpress	DMSO	N22	0.1
	Topotecan	NSC 609699-Y/16	National Cancer Institute	DMSO	G8	10000				Tazemetostat	CT-EPZ438	Chemietek	DMSO	E17	10000
	Topotecan	NSC 609699-Y/16	National Cancer Institute	DMSO	H8	1000				Tazemetostat	CT-EPZ438	Chemietek	DMSO	F17	1000
	Topotecan	NSC 609699-Y/16	National Cancer Institute	DMSO	J8	100				Tazemetostat	CT-EPZ438	Chemietek	DMSO	G17	100
	Topotecan	NSC 609699-Y/16	National Cancer Institute	DMSO	K8	10				Tazemetostat	CT-EPZ438	Chemietek	DMSO	H17	10
	Topotecan	NSC 609699-Y/16	National Cancer Institute	DMSO	L8	1				Tazemetostat	CT-EPZ438	Chemietek	DMSO	I17	1
	Trametinib	CT-GSK112	ChemieTek	DMSO	O14	250				Tosedostat	3595	Tocris Biosciences	DMSO	O4	10000
	Trametinib	CT-GSK112	ChemieTek	DMSO	B15	25				Tosedostat	3595	Tocris Biosciences	DMSO	B5	1000
	Trametinib	CT-GSK112	ChemieTek	DMSO	C15	2.5				Tosedostat	3595	Tocris Biosciences	DMSO	C5	100
	Trametinib	CT-GSK112	ChemieTek	DMSO	D15	0.25				Tosedostat	3595	Tocris Biosciences	DMSO	E5	10
	Trametinib	CT-GSK112	ChemieTek	DMSO	F15	0.025				Tosedostat	3595	Tocris Biosciences	DMSO	F5	1
	Tretinoin	NSC 122758-Q/6	National Cancer Institute	DMSO	D4	10000				Valproic acid	P4543	Sigma-Aldrich	AQ	L2	1000000
	Tretinoin	NSC 122758-Q/6	National Cancer Institute	DMSO	E4	1000				Valproic acid	P4543	Sigma-Aldrich	AQ	M2	100000
	Tretinoin	NSC 122758-Q/6	National Cancer Institute	DMSO	F4	100				Valproic acid	P4543	Sigma-Aldrich	AQ	N2	10000
	Tretinoin	NSC 122758-Q/6	National Cancer Institute	DMSO	G4	10				Valproic acid	P4543	Sigma-Aldrich	AQ	O2	1000
	Tretinoin	NSC 122758-Q/6	National Cancer Institute	DMSO	H4	1				Valproic acid	P4543	Sigma-Aldrich	AQ	B3	100
	Vemurafenib	CT-P4032	ChemieTek	DMSO	E17	10000				Venetoclax	CT-A199-2	Chemietek	DMSO	G10	1000
	Vemurafenib	CT-P4032	ChemieTek	DMSO	F17	1000				Venetoclax	CT-A199-2	Chemietek	DMSO	H10	100
	Vemurafenib	CT-P4032	ChemieTek	DMSO	G17	100				Venetoclax	CT-A199-2	Chemietek	DMSO	I10	10
	Vemurafenib	CT-P4032	ChemieTek	DMSO	H17	10				Venetoclax	CT-A199-2	Chemietek	DMSO	J10	1
	Vemurafenib	CT-P4032	ChemieTek	DMSO	I17	1				Venetoclax	CT-A199-2	Chemietek	DMSO	K10	0.1
	Vincristine	S1241	Selleck	DMSO	L5	1000				Vistusertib	S2783	Selleck	DMSO	M8	10000
	Vincristine	S1241	Selleck	DMSO	M5	100				Vistusertib	S2783	Selleck	DMSO	N8	1000
	Vincristine	S1241	Selleck	DMSO	N5	10				Vistusertib	S2783	Selleck	DMSO	O8	100
	Vincristine	S1241	Selleck	DMSO	O5	1				Vistusertib	S2783	Selleck	DMSO	C9	10
	Vincristine	S1241	Selleck	DMSO	B6	0.1				Vistusertib	S2783	Selleck	DMSO	D9	1
	Vismodegib	V-4050	LC Laboratories	DMSO	G20	10000				Volasertib	CT-BI6727	ChemieTek	DMSO	C3	1000
	Vismodegib	V-4050	LC Laboratories	DMSO	H20	1000				Volasertib	CT-BI6727	ChemieTek	DMSO	D3	100
	Vismodegib	V-4050	LC Laboratories	DMSO	I20	100				Volasertib	CT-BI6727	ChemieTek	DMSO	E3	10
	Vismodegib	V-4050	LC Laboratories	DMSO	J20	10				Volasertib	CT-BI6727	ChemieTek	DMSO	F3	1
	Vismodegib	V-4050	LC Laboratories	DMSO	K20	1				Volasertib	CT-BI6727	ChemieTek	DMSO	G3	0.1
	Vorinostat	V-8477	LC Laboratories	DMSO	J19	10000				VS-4718	CT-VS4718	Chemietek	DMSO	K23	10000
	Vorinostat	V-8477	LC Laboratories	DMSO	K19	1000				VS-4718	CT-VS4718	Chemietek	DMSO	L23	1000
	Vorinostat	V-8477	LC Laboratories	DMSO	L19	100				VS-4718	CT-VS4718	Chemietek	DMSO	M23	100
	Vorinostat	V-8477	LC Laboratories	DMSO	M19	10				VS-4718	CT-VS4718	Chemietek	DMSO	N23	10
	Vorinostat	V-8477	LC Laboratories	DMSO	N19	1				VS-4718	CT-VS4718	Chemietek	DMSO	O23	1
