# Supplementary material for: Comprehensive and unbiased multiparameter high-throughput screening by compaRe finds effective and subtle drug responses in AML models
Source: eLife. 2022 Feb 15;11:e73760. doi: 10.7554/eLife.73760 (PMC9020823; doi:10.7554/eLife.73760)
Supplement: Supplementary file 5. [file elife-73760-supp5.xlsx]

## Sheet: Supplementary table 
Clique ID	Community	UMAP response group	Treatment_concentration (nM)
1	1	2	Nilotinib_100,Alectinib_1
2	1		Sorafenib_0.1,Quizartinib_100
3	1		Sorafenib_1000,Afatinib_1000
4	1		Vorinostat_100,Ipatasertib_1,Afatinib_1000
5	1		Metformin_100000,Metformin_10000,Dexamethasone_10
6	1		Metformin_10000,Metformin_1000,Galunisertib_1,Dexamethasone_10
7	1		Tipifarnib_10,Celecoxib_1000,Celecoxib_100
8	1		Ipatasertib_1,Celecoxib_1000,Celecoxib_100
9	1		Tipifarnib_10,Imatinib_1,Celecoxib_100
10	1		Nilotinib_1,Afatinib_1000
11	1		Tipifarnib_10,Galunisertib_1,Celecoxib_1000,Afatinib_1000
12	1		Ipatasertib_1,Galunisertib_1,Celecoxib_1000,Afatinib_1000
13	1		Metformin_1000,Galunisertib_1,Dexamethasone_10,Celecoxib_1000
14	1		Metformin_1000,Imatinib_1
15	1		Tipifarnib_10,Galunisertib_1,Dexamethasone_10,Celecoxib_1000
16	1		Taselisib_1,Nilotinib_100,Nilotinib_1,GSK2879552_100
17	1		Sorafenib_0.1,Ipatasertib_1,Celecoxib_1000
18	1		Taselisib_1,Sorafenib_0.1
19	2	2	Palbociclib_1000
20	3	1	Trametinib_25
21	4		Onalespib_25
22	5	2	Palbociclib_100
23	6	1	Trametinib_2.5,Nilotinib_1000
24	6	1	NVP-SHP099_100,Nilotinib_1000
25	6	1	Ruxolitinib_100,Nilotinib_1000
26	6	1	Taselisib_100,Cobimetinib_10
27	6	1	Entospletinib_5000,Cobimetinib_10
28	6	1	Ralimetinib_1000,NVP-SHP099_100
29	6		Taselisib_10,Entospletinib_5000
30	6	1	NVP-SHP099_100,Entospletinib_5000
31	6		Duvelisib_500,Alpelisib_250
32	6	1	NVP-SHP099_100,Duvelisib_500
33	6	1	NVP-SHP099_100,BRD7116_1000
34	6		BRD7116_1000,Alpelisib_250
35	7		Sunitinib_100,Axitinib_1000
36	7		Sunitinib_100,Olaparib_10
37	8	1	Tretinoin_10000
38	9	1	AZD-1775_100
39	10	1	Olaparib_100
40	11	2	Idarubicin_1,Erlotinib_10,Anagrelide_1
41	11	2	PTC-209_10,Cytarabine/Idarubicin_ 5 /0,5,Copanlisib_1
42	11	2	Imatinib_100,Bortezomib_1,Anagrelide_1
43	11	2	Imatinib_100,Imatinib_10,Cytarabine/Idarubicin_ 5 /0,5,Anagrelide_1
44	11	2	PTC-209_10,Metformin_100,Imatinib_100,Cytarabine/Idarubicin_ 5 /0,5,Anagrelide_1
45	11	2	Metformin_100,Imatinib_100,Erlotinib_10,Anagrelide_1
46	11	2	Imatinib_100,Imatinib_10,Erlotinib_10,Anagrelide_1
47	12	2	Tretinoin_1000
48	13		Celecoxib_10
49	14	1	Cytarabine_100
50	15	2	Midostaurin_1000,Gemcitabine_10
51	15	2	Tazemetostat_1000,Midostaurin_1000
52	15	2	Tazemetostat_1000,MLN-0128_10
53	16	1	Rucaparib_100
54	17	2	Alisertib_100
55	18	1	Panobinostat_10
56	19	1	Anagrelide_10000
57	20		Mitoxantrone_10
58	21	1	Tipifarnib_1000
59	22		Rucaparib_10,Crenolanib_100
60	23		Everolimus_100
61	24	1	Azacitidine_100
62	25	1	Erlotinib_10000
63	26		Navitoclax_1000,Imatinib_1000
64	27		Tipifarnib_100,Methylprednisolone_1000
65	27		Methylprednisolone_1000,Dexamethasone_100
66	28	1	AZD1152-HQPA_100
67	29		Erlotinib_1000
68	30		Clofarabine_100
69	31	1	Idelalisib_10000
70	32	1	Nilotinib_10000
71	33	1	Dasatinib_1000
72	34	2	Etoposide_100
73	35	1	Dasatinib_100
74	36	1	Ponatinib_100
75	37	1	Dexamethasone_10000
76	38	1	Copanlisib_100
77	39	1	Ruxolitinib_1000
78	40		Dasatinib_10
79	41	1	Dexamethasone_1000
80	42	2	Vincristine_10
81	43	1	Methylprednisolone_10000
82	44		Belinostat_100
83	45	1	Celecoxib_10000
84	46	1	Trametinib_250
85	47		Quizartinib_1000
86	48	1	Regorafenib_10000
87	49	1	Tosedostat_1000
88	50	1	LCL161_250
89	51		NVP-PIM447_10
90	52		Regorafenib_1000
91	53		Pevonedistat_100
92	54	1	Selinexor_1000
93	55	1	Rocilinostat_1000
94	56		Silmitasertib_10000
95	57	1	BGB324_1000
96	58	1	Nintedanib_1000
97	59		CPI-613_10000
98	60	2	Tazemetostat_10000
99	61		Nintedanib_100
100	62	1	GSK525762_1000
101	63	1	Birinapant_1000
102	64		GSK525762_100
103	65		AZD0156_100
104	66	1	Birinapant_100
105	67	1	BRD7116_10000
106	68		Gedatolisib_100
107	69		Silmitasertib_1
108	70	1	Cobimetinib_100
109	71		Chloroquine_1000
110	72	1	Birabresib_100
111	73	1	Taselisib_1000
112	74		AZD0156_0.1
113	75		Omacetaxine_10
114	76	1	Momelotinib_100
115	77	1	NVP-SHP099_1000
116	78		Ceritinib_250
117	79	1	Valproic acid_1000000
118	80		Ipatasertib_10000
119	81	1	GSK2879552_100000
120	82	1	Idasanutlin_100
121	83	2	Amcasertib_10000,Amcasertib_1000
122	84	1	Ibrutinib_100
123	85	1	Alpelisib_2500
124	86	1	SCH772984_1000
125	87		GSK2879552_10000
126	88	1	NVP-PIM447_1000
127	89	1	Vistusertib_1000
128	90	1	SCH772984_100
129	91		GSK2879552_1000
130	92	1	NVP-PIM447_100
131	93		Valproic acid_1000
132	94	1	MLN-0128_100
133	95	2	Hydroxyfasudil _37500
134	96	1	LCL161_2500
