# Supplementary material for: Comprehensive and unbiased multiparameter high-throughput screening by compaRe finds effective and subtle drug responses in AML models
Source: eLife. 2022 Feb 15;11:e73760. doi: 10.7554/eLife.73760 (PMC9020823; doi:10.7554/eLife.73760)
Supplement: Supplementary file 6. [file elife-73760-supp6.xlsx]

## Sheet: Sheet1
Compound	Specific target	Pathway	Reference
Trametinib	MEK1/2	Trametinib directly inhibits the kinase activity of MAPK pathway kinases MEK1 and MEK2.	1
Cobimetinib	MEK1/2	Cobimetinib directly inhibits the kinase activity of MAPK pathway kinases MEK1 and MEK2.	1
SCH772984	ERK1/2	SCH772984 directly inhibits the kinase activity of MAPK pathway kinases ERK1 and ERK2.	1
SHP099	SHP2	SHP099 inhibits the SHP2 protein tyrosine phosphatase, which is a facilitator and potentiator of MAPK signaling activity, functioning both upstream of RAS and directly on the RAF-MEK-ERK kinases	2
Entospletinib	SYK	Entospletinib is a SYK kinase inhibitor that has been shown to downregulate MAPK pathway activity in AML	3
Dasatinib	KIT, CSF-1R, ABL, SRC	Dasatinib is a potent inhibitor of receptor tyrosine kinases such as KIT and CSF1R that utilize the MAPK pathway to regulate myeloid cell proliferation and differentiation.	4, 5, 6
Nilotinib	KIT, CSF-1R, BCR-ABL, PDGFRa, DDR-1/2	Nilotinib is a potent inhibitor of receptor tyrosine kinases such as KIT and CSF1R that utilize the MAPK pathway to regulate myeloid cell proliferation and differentiation.	4, 5, 6, 7
Ponatinib	KIT, ABL, PDGFRa, VEGFR2, FGFR1	Ponatinib is a potent inhibitor of receptor tyrosine kinases such as KIT that utilizes the MAPK pathway to regulate myeloid cell proliferation and differentiation.	5, 6
Vincristine	microtubule polymerization inhibitor	Vincristine is an antimitotic drug that interferes with microtubule/tubulin dynamics.	8
Tazemetostat	EZH2	Tazemetostat is an EZH2 inhibitor. EZH2 is a histone methyltransferase which regulates gene expression and cell differentiation through histone modification.	9
Tretinoin	Retinoic acid receptor agonist	Tretinoin is a pan-retinoic acid receptor agonist that stimulates hematopoietic progenitor cell differentiation through activation of retinoic acid signaling.	10
