# Supplementary material for: Comprehensive and unbiased multiparameter high-throughput screening by compaRe finds effective and subtle drug responses in AML models
Source: eLife. 2022 Feb 15;11:e73760. doi: 10.7554/eLife.73760 (PMC9020823; doi:10.7554/eLife.73760)
Supplement: Supplementary file 7. [file elife-73760-supp7.xlsx]

## Sheet: QA1B-Layout with names
	1	2	3	4	5	6	7	8	9	10	11	12	13	14	15	16	17	18	19	20	21	22	23	24
A	empty	empty	empty	empty	empty	empty	empty	empty	empty	empty	empty	empty	empty	empty	empty	empty	empty	empty	empty	empty	empty	empty	empty	empty
B	DMSO	Dexamethasone	Tretinoin	Clofarabine	Vincristine	Navitoclax	Trametinib	Ruxolitinib	Lenalidomide	Quizartinib	DMSO	Copanlisib	Tazemetostat	Pinometostat	Birabresib	Enasidenib	A-1331852	Ivosidenib	Vidofludimus	S-63845	Azacitidine	Combo Venetoclax/azacitidine	Cytarabine	DMSO
C	empty	Dexamethasone	DMSO	Clofarabine	Vincristine	Navitoclax	Trametinib	Ruxolitinib	Lenalidomide	Quizartinib	Valproic acid	NVP-LCL161	Tazemetostat	Pinometostat	Birabresib	Enasidenib	A-1331852	DMSO	Vidofludimus	S-63845	Azacitidine	Combo Venetoclax/azacitidine	Cytarabine	DMSO
D	DMSO	Dexamethasone	Glasdegib	DMSO	Vincristine	Navitoclax	Trametinib	Ruxolitinib	Lenalidomide	Quizartinib	Valproic acid	NVP-LCL161	DMSO	Pinometostat	Birabresib	Enasidenib	A-1331852	NVP-SHP099	Vidofludimus	S-63845	Azacitidine	Combo Venetoclax/azacitidine	Cytarabine	DMSO
E	DMSO	Dexamethasone	Glasdegib	Mitoxantrone	Palbociclib	Navitoclax	Trametinib	Ruxolitinib	Lenalidomide	Quizartinib	Valproic acid	NVP-LCL161	DMSO	Pinometostat	Birabresib	Enasidenib	A-1331852	NVP-SHP099	DMSO	S-63845	Azacitidine	Combo Venetoclax/azacitidine	Cytarabine	DMSO
F	DMSO	Dexamethasone	Glasdegib	Mitoxantrone	Palbociclib	Ponatinib	DMSO	Ruxolitinib	Lenalidomide	Quizartinib	Valproic acid	NVP-LCL161	DMSO	Pinometostat	Birabresib	Enasidenib	A-1331852	NVP-SHP099	PIM-447	Nelarabine	Azacitidine	Combo Venetoclax/azacitidine	Cytarabine	DMSO
G	DMSO	Dexamethasone	Glasdegib	Mitoxantrone	Palbociclib	Ponatinib	Everolimus	Dasatinib	Lenalidomide	Quizartinib	Valproic acid	NVP-LCL161	DMSO	DMSO	Birabresib	Enasidenib	A-1331852	NVP-SHP099	PIM-447	Nelarabine	empty	Combo Venetoclax/azacitidine	Cytarabine	DMSO
H	DMSO	Dexamethasone	Glasdegib	Mitoxantrone	Palbociclib	Ponatinib	Everolimus	Dasatinib	Sorafenib	DMSO	Valproic acid	NVP-LCL161	DMSO	Selinexor	DMSO	Enasidenib	A-1331852	NVP-SHP099	PIM-447	Nelarabine	Venetoclax	Daunorubicin	DMSO	DMSO
I	DMSO	DMSO	Glasdegib	Mitoxantrone	Palbociclib	Ponatinib	Everolimus	Dasatinib	Sorafenib	Midostaurin	Valproic acid	NVP-LCL161	DMSO	Selinexor	Idasanutlin	Gilteritinib	DMSO	NVP-SHP099	PIM-447	Nelarabine	Venetoclax	Daunorubicin	Combo Cytarabine/daunorubicin	DMSO
J	DMSO	Tretinoin	Glasdegib	Mitoxantrone	Palbociclib	Ponatinib	Everolimus	Dasatinib	Sorafenib	Midostaurin	Copanlisib	DMSO	DMSO	Selinexor	Idasanutlin	Gilteritinib	Ivosidenib	NVP-SHP099	PIM-447	Nelarabine	Venetoclax	Daunorubicin	Combo Cytarabine/daunorubicin	DMSO
K	DMSO	Tretinoin	Clofarabine	Mitoxantrone	Palbociclib	Ponatinib	Everolimus	Dasatinib	Sorafenib	Midostaurin	Copanlisib	Tazemetostat	DMSO	Selinexor	Idasanutlin	Gilteritinib	Ivosidenib	DMSO	PIM-447	Nelarabine	Venetoclax	Daunorubicin	Combo Cytarabine/daunorubicin	DMSO
L	DMSO	Tretinoin	Clofarabine	Vincristine	DMSO	Ponatinib	Everolimus	Dasatinib	Sorafenib	Midostaurin	Copanlisib	Tazemetostat	BzCl	Selinexor	Idasanutlin	Gilteritinib	Ivosidenib	Vidofludimus	PIM-447	Nelarabine	Venetoclax	Daunorubicin	Combo Cytarabine/daunorubicin	DMSO
M	DMSO	Tretinoin	Clofarabine	Vincristine	Navitoclax	Trametinib	Everolimus	Dasatinib	Sorafenib	Midostaurin	Copanlisib	Tazemetostat	DMSO	Selinexor	Idasanutlin	Gilteritinib	Ivosidenib	Vidofludimus	S-63845	DMSO	Venetoclax	Daunorubicin	Combo Cytarabine/daunorubicin	BzCl
N	DMSO	Tretinoin	Clofarabine	Vincristine	Navitoclax	Trametinib	Ruxolitinib	DMSO	Sorafenib	Midostaurin	Copanlisib	Tazemetostat	Pinometostat	Selinexor	Idasanutlin	Gilteritinib	Ivosidenib	Vidofludimus	S-63845	Azacitidine	Venetoclax	Daunorubicin	Combo Cytarabine/daunorubicin	DMSO
O	DMSO	Tretinoin	Clofarabine	Vincristine	Navitoclax	Trametinib	Ruxolitinib	Lenalidomide	Quizartinib	Midostaurin	Copanlisib	Tazemetostat	Pinometostat	Birabresib	Idasanutlin	Gilteritinib	Ivosidenib	Vidofludimus	S-63845	Azacitidine	Combo Venetoclax/azacitidine	Cytarabine	Combo Cytarabine/daunorubicin	DMSO
P	empty	empty	empty	empty	empty	empty	empty	empty	empty	empty	empty	empty	empty	empty	empty	empty	empty	empty	empty	empty	empty	empty	empty	empty
	1	2	3	4	5	6	7	8	9	10	11	12	13	14	15	16	17	18	19	20	21	22	23	24
A	A1	A2	A3	A4	A5	A6	A7	A8	A9	A10	A11	A12	A13	A14	A15	A16	A17	A18	A19	A20	A21	A22	A23	A24
B	B1	B2	B3	B4	B5	B6	B7	B8	B9	B10	B11	B12	B13	B14	B15	B16	B17	B18	B19	B20	B21	B22	B23	B24
C	C1	C2	C3	C4	C5	C6	C7	C8	C9	C10	C11	C12	C13	C14	C15	C16	C17	C18	C19	C20	C21	C22	C23	C24
D	D1	D2	D3	D4	D5	D6	D7	D8	D9	D10	D11	D12	D13	D14	D15	D16	D17	D18	D19	D20	D21	D22	D23	D24
E	E1	E2	E3	E4	E5	E6	E7	E8	E9	E10	E11	E12	E13	E14	E15	E16	E17	E18	E19	E20	E21	E22	E23	E24
F	F1	F2	F3	F4	F5	F6	F7	F8	F9	F10	F11	F12	F13	F14	F15	F16	F17	F18	F19	F20	F21	F22	F23	F24
G	G1	G2	G3	G4	G5	G6	G7	G8	G9	G10	G11	G12	G13	G14	G15	G16	G17	G18	G19	G20	G21	G22	G23	G24
H	H1	H2	H3	H4	H5	H6	H7	H8	H9	H10	H11	H12	H13	H14	H15	H16	H17	H18	H19	H20	H21	H22	H23	H24
I	I1	I2	I3	I4	I5	I6	I7	I8	I9	I10	I11	I12	I13	I14	I15	I16	I17	I18	I19	I20	I21	I22	I23	I24
J	J1	J2	J3	J4	J5	J6	J7	J8	J9	J10	J11	J12	J13	J14	J15	J16	J17	J18	J19	J20	J21	J22	J23	J24
K	K1	K2	K3	K4	K5	K6	K7	K8	K9	K10	K11	K12	K13	K14	K15	K16	K17	K18	K19	K20	K21	K22	K23	K24
L	L1	L2	L3	L4	L5	L6	L7	L8	L9	L10	L11	L12	L13	L14	L15	L16	L17	L18	L19	L20	L21	L22	L23	L24
M	M1	M2	M3	M4	M5	M6	M7	M8	M9	M10	M11	M12	M13	M14	M15	M16	M17	M18	M19	M20	M21	M22	M23	M24
N	N1	N2	N3	N4	N5	N6	N7	N8	N9	N10	N11	N12	N13	N14	N15	N16	N17	N18	N19	N20	N21	N22	N23	N24
O	O1	O2	O3	O4	O5	O6	O7	O8	O9	O10	O11	O12	O13	O14	O15	O16	O17	O18	O19	O20	O21	O22	O23	O24
P	P1	P2	P3	P4	P5	P6	P7	P8	P9	P10	P11	P12	P13	P14	P15	P16	P17	P18	P19	P20	P21	P22	P23	P24

## Sheet: QA1B-Drug Plate Annotations
DRUG_NAME	SupplierRef	Supplier	Solvent	Well	Concentration (nM)
A-1331852	CT-A133	ChemieTek	DMSO	B17	375
A-1331852	CT-A133	ChemieTek	DMSO	C17	125
A-1331852	CT-A133	ChemieTek	DMSO	D17	37.5
A-1331852	CT-A133	ChemieTek	DMSO	E17	12.5
A-1331852	CT-A133	ChemieTek	DMSO	F17	3.75
A-1331852	CT-A133	ChemieTek	DMSO	G17	1.25
A-1331852	CT-A133	ChemieTek	DMSO	H17	0.375
Azacitidine	HY-10586	Medchem Express	DMSO	N20	1250
Azacitidine	HY-10586	Medchem Express	DMSO	O20	375
Azacitidine	HY-10586	Medchem Express	DMSO	B21	125
Azacitidine	HY-10586	Medchem Express	DMSO	C21	37.5
Azacitidine	HY-10586	Medchem Express	DMSO	D21	12.5
Azacitidine	HY-10586	Medchem Express	DMSO	E21	3.75
Azacitidine	HY-10586	Medchem Express	DMSO	F21	1.25
Birabresib	S7360-2	Selleck	DMSO	O14	3750
Birabresib	S7360-2	Selleck	DMSO	B15	1250
Birabresib	S7360-2	Selleck	DMSO	C15	375
Birabresib	S7360-2	Selleck	DMSO	D15	125
Birabresib	S7360-2	Selleck	DMSO	E15	37.5
Birabresib	S7360-2	Selleck	DMSO	F15	12.5
Birabresib	S7360-2	Selleck	DMSO	G15	3.75
Benzethonium Chloride	B8879	Sigma-Aldrich	DMSO	L13	100000
Benzethonium Chloride	B8879	Sigma-Aldrich	DMSO	M24	100000
Clofarabine	2600	Tocris Biosciences	DMSO	K3	1250
Clofarabine	2600	Tocris Biosciences	DMSO	L3	375
Clofarabine	2600	Tocris Biosciences	DMSO	M3	125
Clofarabine	2600	Tocris Biosciences	DMSO	N3	37.5
Clofarabine	2600	Tocris Biosciences	DMSO	O3	12.5
Clofarabine	2600	Tocris Biosciences	DMSO	B4	3.75
Clofarabine	2600	Tocris Biosciences	DMSO	C4	1.25
Copanlisib	S2802-2	Selleck	DMSO	J11	1250
Copanlisib	S2802-2	Selleck	DMSO	K11	375
Copanlisib	S2802-2	Selleck	DMSO	L11	125
Copanlisib	S2802-2	Selleck	DMSO	M11	37.5
Copanlisib	S2802-2	Selleck	DMSO	N11	12.5
Copanlisib	S2802-2	Selleck	DMSO	O11	3.75
Copanlisib	S2802-2	Selleck	DMSO	B12	1.25
Cytarabine	HY-13605	Medchem Express	DMSO	O22	1250
Cytarabine	HY-13605	Medchem Express	DMSO	B23	375
Cytarabine	HY-13605	Medchem Express	DMSO	C23	125
Cytarabine	HY-13605	Medchem Express	DMSO	D23	37.5
Cytarabine	HY-13605	Medchem Express	DMSO	E23	12.5
Cytarabine	HY-13605	Medchem Express	DMSO	F23	3.75
Cytarabine	HY-13605	Medchem Express	DMSO	G23	1.25
Cytarabine/daunorubicin	Combo		DMSO	I23	3750/375
Cytarabine/daunorubicin	Combo		DMSO	J23	1250/125
Cytarabine/daunorubicin	Combo		DMSO	K23	375/37,5
Cytarabine/daunorubicin	Combo		DMSO	L23	125/12,5
Cytarabine/daunorubicin	Combo		DMSO	M23	37,5/3,75
Cytarabine/daunorubicin	Combo		DMSO	N23	12,5/1,25
Cytarabine/daunorubicin	Combo		DMSO	O23	3,75/0,375
Dasatinib	D-3307	LC Laboratories	DMSO	G8	375
Dasatinib	D-3307	LC Laboratories	DMSO	H8	125
Dasatinib	D-3307	LC Laboratories	DMSO	I8	37.5
Dasatinib	D-3307	LC Laboratories	DMSO	J8	12.5
Dasatinib	D-3307	LC Laboratories	DMSO	K8	3.75
Dasatinib	D-3307	LC Laboratories	DMSO	L8	1.25
Dasatinib	D-3307	LC Laboratories	DMSO	M8	0.375
Daunorubicin	HY-13062	Medchem Express	DMSO	H22	375
Daunorubicin	HY-13062	Medchem Express	DMSO	I22	125
Daunorubicin	HY-13062	Medchem Express	DMSO	J22	37.5
Daunorubicin	HY-13062	Medchem Express	DMSO	K22	12.5
Daunorubicin	HY-13062	Medchem Express	DMSO	L22	3.75
Daunorubicin	HY-13062	Medchem Express	DMSO	M22	1.25
Daunorubicin	HY-13062	Medchem Express	DMSO	N22	0.375
Dexamethasone	S1322	Selleck	DMSO	B2	1250
Dexamethasone	S1322	Selleck	DMSO	C2	375
Dexamethasone	S1322	Selleck	DMSO	D2	125
Dexamethasone	S1322	Selleck	DMSO	E2	37.5
Dexamethasone	S1322	Selleck	DMSO	F2	12.5
Dexamethasone	S1322	Selleck	DMSO	G2	3.75
Dexamethasone	S1322	Selleck	DMSO	H2	1.25
DMSO	34869	Merck	DMSO	B1	0
DMSO	34869	Merck	DMSO	D1	0
DMSO	34869	Merck	DMSO	E1	0
DMSO	34869	Merck	DMSO	F1	0
DMSO	34869	Merck	DMSO	G1	0
DMSO	34869	Merck	DMSO	H1	0
DMSO	34869	Merck	DMSO	I1	0
DMSO	34869	Merck	DMSO	J1	0
DMSO	34869	Merck	DMSO	K1	0
DMSO	34869	Merck	DMSO	L1	0
DMSO	34869	Merck	DMSO	M1	0
DMSO	34869	Merck	DMSO	N1	0
DMSO	34869	Merck	DMSO	O1	0
DMSO	34869	Merck	DMSO	I2	0
DMSO	34869	Merck	DMSO	C3	0
DMSO	34869	Merck	DMSO	D4	0
DMSO	34869	Merck	DMSO	L5	0
DMSO	34869	Merck	DMSO	F7	0
DMSO	34869	Merck	DMSO	N8	0
DMSO	34869	Merck	DMSO	H10	0
DMSO	34869	Merck	DMSO	B11	0
DMSO	34869	Merck	DMSO	J12	0
DMSO	34869	Merck	DMSO	D13	0
DMSO	34869	Merck	DMSO	E13	0
DMSO	34869	Merck	DMSO	F13	0
DMSO	34869	Merck	DMSO	G13	0
DMSO	34869	Merck	DMSO	H13	0
DMSO	34869	Merck	DMSO	I13	0
DMSO	34869	Merck	DMSO	J13	0
DMSO	34869	Merck	DMSO	K13	0
DMSO	34869	Merck	DMSO	M13	0
DMSO	34869	Merck	DMSO	G14	0
DMSO	34869	Merck	DMSO	H15	0
DMSO	34869	Merck	DMSO	I17	0
DMSO	34869	Merck	DMSO	C18	0
DMSO	34869	Merck	DMSO	K18	0
DMSO	34869	Merck	DMSO	E19	0
DMSO	34869	Merck	DMSO	M20	0
DMSO	34869	Merck	DMSO	H23	0
DMSO	34869	Merck	DMSO	B24	0
DMSO	34869	Merck	DMSO	C24	0
DMSO	34869	Merck	DMSO	D24	0
DMSO	34869	Merck	DMSO	E24	0
DMSO	34869	Merck	DMSO	F24	0
DMSO	34869	Merck	DMSO	G24	0
DMSO	34869	Merck	DMSO	H24	0
DMSO	34869	Merck	DMSO	I24	0
DMSO	34869	Merck	DMSO	J24	0
DMSO	34869	Merck	DMSO	K24	0
DMSO	34869	Merck	DMSO	L24	0
DMSO	34869	Merck	DMSO	N24	0
DMSO	34869	Merck	DMSO	O24	0
Enasidenib	HY-18690	Medchem Express	DMSO	B16	125
Enasidenib	HY-18690	Medchem Express	DMSO	C16	37.5
Enasidenib	HY-18690	Medchem Express	DMSO	D16	12.5
Enasidenib	HY-18690	Medchem Express	DMSO	E16	3.75
Enasidenib	HY-18690	Medchem Express	DMSO	F16	1.25
Enasidenib	HY-18690	Medchem Express	DMSO	G16	0.375
Enasidenib	HY-18690	Medchem Express	DMSO	H16	0.125
Everolimus	E-4040	LC Laboratories	DMSO	G7	125
Everolimus	E-4040	LC Laboratories	DMSO	H7	37.5
Everolimus	E-4040	LC Laboratories	DMSO	I7	12.5
Everolimus	E-4040	LC Laboratories	DMSO	J7	3.75
Everolimus	E-4040	LC Laboratories	DMSO	K7	1.25
Everolimus	E-4040	LC Laboratories	DMSO	L7	0.375
Everolimus	E-4040	LC Laboratories	DMSO	M7	0.125
Gilteritinib	CT-GILT	ChemieTek	DMSO	I16	375
Gilteritinib	CT-GILT	ChemieTek	DMSO	J16	125
Gilteritinib	CT-GILT	ChemieTek	DMSO	K16	37.5
Gilteritinib	CT-GILT	ChemieTek	DMSO	L16	12.5
Gilteritinib	CT-GILT	ChemieTek	DMSO	M16	3.75
Gilteritinib	CT-GILT	ChemieTek	DMSO	N16	1.25
Gilteritinib	CT-GILT	ChemieTek	DMSO	O16	0.375
Glasdegib	HY-16391	Medchem Express	DMSO	D3	375
Glasdegib	HY-16391	Medchem Express	DMSO	E3	125
Glasdegib	HY-16391	Medchem Express	DMSO	F3	37.5
Glasdegib	HY-16391	Medchem Express	DMSO	G3	12.5
Glasdegib	HY-16391	Medchem Express	DMSO	H3	3.75
Glasdegib	HY-16391	Medchem Express	DMSO	I3	1.25
Glasdegib	HY-16391	Medchem Express	DMSO	J3	0.375
Idasanutlin	HY-15676	Medchem Express	DMSO	I15	3750
Idasanutlin	HY-15676	Medchem Express	DMSO	J15	1250
Idasanutlin	HY-15676	Medchem Express	DMSO	K15	375
Idasanutlin	HY-15676	Medchem Express	DMSO	L15	125
Idasanutlin	HY-15676	Medchem Express	DMSO	M15	37.5
Idasanutlin	HY-15676	Medchem Express	DMSO	N15	12.5
Idasanutlin	HY-15676	Medchem Express	DMSO	O15	3.75
Ivosidenib	CT-AG120	ChemieTek	DMSO	J17	125
Ivosidenib	CT-AG120	ChemieTek	DMSO	K17	37.5
Ivosidenib	CT-AG120	ChemieTek	DMSO	L17	12.5
Ivosidenib	CT-AG120	ChemieTek	DMSO	M17	3.75
Ivosidenib	CT-AG120	ChemieTek	DMSO	N17	1.25
Ivosidenib	CT-AG120	ChemieTek	DMSO	O17	0.375
Ivosidenib	CT-AG120	ChemieTek	DMSO	B18	0.125
Lenalidomide	L-5499	LC Laboratories	DMSO	O8	12500
Lenalidomide	L-5499	LC Laboratories	DMSO	B9	3750
Lenalidomide	L-5499	LC Laboratories	DMSO	C9	1250
Lenalidomide	L-5499	LC Laboratories	DMSO	D9	375
Lenalidomide	L-5499	LC Laboratories	DMSO	E9	125
Lenalidomide	L-5499	LC Laboratories	DMSO	F9	37.5
Lenalidomide	L-5499	LC Laboratories	DMSO	G9	12.5
Midostaurin	HY-10230	Medchem Express	DMSO	I10	375
Midostaurin	HY-10230	Medchem Express	DMSO	J10	125
Midostaurin	HY-10230	Medchem Express	DMSO	K10	37.5
Midostaurin	HY-10230	Medchem Express	DMSO	L10	12.5
Midostaurin	HY-10230	Medchem Express	DMSO	M10	3.75
Midostaurin	HY-10230	Medchem Express	DMSO	N10	1.25
Midostaurin	HY-10230	Medchem Express	DMSO	O10	0.375
Mitoxantrone	HY-13502A	Medchem Express	DMSO	E4	375
Mitoxantrone	HY-13502A	Medchem Express	DMSO	F4	125
Mitoxantrone	HY-13502A	Medchem Express	DMSO	G4	37.5
Mitoxantrone	HY-13502A	Medchem Express	DMSO	H4	12.5
Mitoxantrone	HY-13502A	Medchem Express	DMSO	I4	3.75
Mitoxantrone	HY-13502A	Medchem Express	DMSO	J4	1.25
Mitoxantrone	HY-13502A	Medchem Express	DMSO	K4	0.375
Navitoclax	S1001-3	Selleck	DMSO	M5	1250
Navitoclax	S1001-3	Selleck	DMSO	N5	375
Navitoclax	S1001-3	Selleck	DMSO	O5	125
Navitoclax	S1001-3	Selleck	DMSO	B6	37.5
Navitoclax	S1001-3	Selleck	DMSO	C6	12.5
Navitoclax	S1001-3	Selleck	DMSO	D6	3.75
Navitoclax	S1001-3	Selleck	DMSO	E6	1.25
Nelarabine	SRP003328n	SequoiaResearchProducts	DMSO	F20	1250
Nelarabine	SRP003328n	SequoiaResearchProducts	DMSO	G20	375
Nelarabine	SRP003328n	SequoiaResearchProducts	DMSO	H20	125
Nelarabine	SRP003328n	SequoiaResearchProducts	DMSO	I20	37.5
Nelarabine	SRP003328n	SequoiaResearchProducts	DMSO	J20	12.5
Nelarabine	SRP003328n	SequoiaResearchProducts	DMSO	K20	3.75
Nelarabine	SRP003328n	SequoiaResearchProducts	DMSO	L20	1.25
NVP-LCL161	CT-LCL161	ChemieTek	DMSO	C12	12500
NVP-LCL161	CT-LCL161	ChemieTek	DMSO	D12	3750
NVP-LCL161	CT-LCL161	ChemieTek	DMSO	E12	1250
NVP-LCL161	CT-LCL161	ChemieTek	DMSO	F12	375
NVP-LCL161	CT-LCL161	ChemieTek	DMSO	G12	125
NVP-LCL161	CT-LCL161	ChemieTek	DMSO	H12	37.5
NVP-LCL161	CT-LCL161	ChemieTek	DMSO	I12	12.5
NVP-SHP099	HY-100388A	Medchem Express	DMSO	D18	12500
NVP-SHP099	HY-100388A	Medchem Express	DMSO	E18	3750
NVP-SHP099	HY-100388A	Medchem Express	DMSO	F18	1250
NVP-SHP099	HY-100388A	Medchem Express	DMSO	G18	375
NVP-SHP099	HY-100388A	Medchem Express	DMSO	H18	125
NVP-SHP099	HY-100388A	Medchem Express	DMSO	I18	37.5
NVP-SHP099	HY-100388A	Medchem Express	DMSO	J18	12.5
Palbociclib	S1116-2	Selleck	AQ	E5	1250
Palbociclib	S1116-2	Selleck	AQ	F5	375
Palbociclib	S1116-2	Selleck	AQ	G5	125
Palbociclib	S1116-2	Selleck	AQ	H5	37.5
Palbociclib	S1116-2	Selleck	AQ	I5	12.5
Palbociclib	S1116-2	Selleck	AQ	J5	3.75
Palbociclib	S1116-2	Selleck	AQ	K5	1.25
PIM-447	HY-19322B	Medchem Express	DMSO	F19	3750
PIM-447	HY-19322B	Medchem Express	DMSO	G19	1250
PIM-447	HY-19322B	Medchem Express	DMSO	H19	375
PIM-447	HY-19322B	Medchem Express	DMSO	I19	125
PIM-447	HY-19322B	Medchem Express	DMSO	J19	37.5
PIM-447	HY-19322B	Medchem Express	DMSO	K19	12.5
PIM-447	HY-19322B	Medchem Express	DMSO	L19	3.75
Pinometostat	S7062	Selleck	DMSO	N13	1250
Pinometostat	S7062	Selleck	DMSO	O13	375
Pinometostat	S7062	Selleck	DMSO	B14	125
Pinometostat	S7062	Selleck	DMSO	C14	37.5
Pinometostat	S7062	Selleck	DMSO	D14	12.5
Pinometostat	S7062	Selleck	DMSO	E14	3.75
Pinometostat	S7062	Selleck	DMSO	F14	1.25
Ponatinib	S1490	Selleck	DMSO	F6	125
Ponatinib	S1490	Selleck	DMSO	G6	37.5
Ponatinib	S1490	Selleck	DMSO	H6	12.5
Ponatinib	S1490	Selleck	DMSO	I6	3.75
Ponatinib	S1490	Selleck	DMSO	J6	1.25
Ponatinib	S1490	Selleck	DMSO	K6	0.375
Ponatinib	S1490	Selleck	DMSO	L6	0.125
Quizartinib	CT-AC220	ChemieTek	DMSO	O9	375
Quizartinib	CT-AC220	ChemieTek	DMSO	B10	125
Quizartinib	CT-AC220	ChemieTek	DMSO	C10	37.5
Quizartinib	CT-AC220	ChemieTek	DMSO	D10	12.5
Quizartinib	CT-AC220	ChemieTek	DMSO	E10	3.75
Quizartinib	CT-AC220	ChemieTek	DMSO	F10	1.25
Quizartinib	CT-AC220	ChemieTek	DMSO	G10	0.375
Ruxolitinib	CT-INCB-2	ChemieTek	DMSO	N7	3750
Ruxolitinib	CT-INCB-2	ChemieTek	DMSO	O7	1250
Ruxolitinib	CT-INCB-2	ChemieTek	DMSO	B8	375
Ruxolitinib	CT-INCB-2	ChemieTek	DMSO	C8	125
Ruxolitinib	CT-INCB-2	ChemieTek	DMSO	D8	37.5
Ruxolitinib	CT-INCB-2	ChemieTek	DMSO	E8	12.5
Ruxolitinib	CT-INCB-2	ChemieTek	DMSO	F8	3.75
S-63845	CT-S63845	ChemieTek	DMSO	M19	375
S-63845	CT-S63845	ChemieTek	DMSO	N19	125
S-63845	CT-S63845	ChemieTek	DMSO	O19	37.5
S-63845	CT-S63845	ChemieTek	DMSO	B20	12.5
S-63845	CT-S63845	ChemieTek	DMSO	C20	3.75
S-63845	CT-S63845	ChemieTek	DMSO	D20	1.25
S-63845	CT-S63845	ChemieTek	DMSO	E20	0.375
Selinexor	S7252	Selleck	DMSO	H14	3750
Selinexor	S7252	Selleck	DMSO	I14	1250
Selinexor	S7252	Selleck	DMSO	J14	375
Selinexor	S7252	Selleck	DMSO	K14	125
Selinexor	S7252	Selleck	DMSO	L14	37.5
Selinexor	S7252	Selleck	DMSO	M14	12.5
Selinexor	S7252	Selleck	DMSO	N14	3.75
Sorafenib	S-8502	LC Laboratories	DMSO	H9	375
Sorafenib	S-8502	LC Laboratories	DMSO	I9	125
Sorafenib	S-8502	LC Laboratories	DMSO	J9	37.5
Sorafenib	S-8502	LC Laboratories	DMSO	K9	12.5
Sorafenib	S-8502	LC Laboratories	DMSO	L9	3.75
Sorafenib	S-8502	LC Laboratories	DMSO	M9	1.25
Sorafenib	S-8502	LC Laboratories	DMSO	N9	0.375
Tazemetostat	CT-EPZ438	ChemieTek	DMSO	K12	3750
Tazemetostat	CT-EPZ438	ChemieTek	DMSO	L12	1250
Tazemetostat	CT-EPZ438	ChemieTek	DMSO	M12	375
Tazemetostat	CT-EPZ438	ChemieTek	DMSO	N12	125
Tazemetostat	CT-EPZ438	ChemieTek	DMSO	O12	37.5
Tazemetostat	CT-EPZ438	ChemieTek	DMSO	B13	12.5
Tazemetostat	CT-EPZ438	ChemieTek	DMSO	C13	3.75
Trametinib	CT-GSK112	ChemieTek	DMSO	M6	125
Trametinib	CT-GSK112	ChemieTek	DMSO	N6	37.5
Trametinib	CT-GSK112	ChemieTek	DMSO	O6	12.5
Trametinib	CT-GSK112	ChemieTek	DMSO	B7	3.75
Trametinib	CT-GSK112	ChemieTek	DMSO	C7	1.25
Trametinib	CT-GSK112	ChemieTek	DMSO	D7	0.375
Trametinib	CT-GSK112	ChemieTek	DMSO	E7	0.125
Tretinoin	HY-14649	Medchem Express	DMSO	J2	3750
Tretinoin	HY-14649	Medchem Express	DMSO	K2	1250
Tretinoin	HY-14649	Medchem Express	DMSO	L2	375
Tretinoin	HY-14649	Medchem Express	DMSO	M2	125
Tretinoin	HY-14649	Medchem Express	DMSO	N2	37.5
Tretinoin	HY-14649	Medchem Express	DMSO	O2	12.5
Tretinoin	HY-14649	Medchem Express	DMSO	B3	3.75
Valproic acid	P4543	Sigma-Aldrich	AQ	C11	375000
Valproic acid	P4543	Sigma-Aldrich	AQ	D11	125000
Valproic acid	P4543	Sigma-Aldrich	AQ	E11	37500
Valproic acid	P4543	Sigma-Aldrich	AQ	F11	12500
Valproic acid	P4543	Sigma-Aldrich	AQ	G11	3750
Valproic acid	P4543	Sigma-Aldrich	AQ	H11	1250
Valproic acid	P4543	Sigma-Aldrich	AQ	I11	375
Venetoclax	CT-A199-2	ChemieTek	DMSO	H21	375
Venetoclax	CT-A199-2	ChemieTek	DMSO	I21	125
Venetoclax	CT-A199-2	ChemieTek	DMSO	J21	37.5
Venetoclax	CT-A199-2	ChemieTek	DMSO	K21	12.5
Venetoclax	CT-A199-2	ChemieTek	DMSO	L21	3.75
Venetoclax	CT-A199-2	ChemieTek	DMSO	M21	1.25
Venetoclax	CT-A199-2	ChemieTek	DMSO	N21	0.375
Venetoclax/azacitidine	Combo		DMSO	O21	1250/1250
Venetoclax/azacitidine	Combo		DMSO	B22	375/1250
Venetoclax/azacitidine	Combo		DMSO	C22	125/1250
Venetoclax/azacitidine	Combo		DMSO	D22	37,5/1250
Venetoclax/azacitidine	Combo		DMSO	E22	12,5/1250
Venetoclax/azacitidine	Combo		DMSO	F22	3,75/1250
Venetoclax/azacitidine	Combo		DMSO	G22	1,25/1250
Vidofludimus	HY-14908	Medchem Express	DMSO	L18	12500
Vidofludimus	HY-14908	Medchem Express	DMSO	M18	3750
Vidofludimus	HY-14908	Medchem Express	DMSO	N18	1250
Vidofludimus	HY-14908	Medchem Express	DMSO	O18	375
Vidofludimus	HY-14908	Medchem Express	DMSO	B19	125
Vidofludimus	HY-14908	Medchem Express	DMSO	C19	37.5
Vidofludimus	HY-14908	Medchem Express	DMSO	D19	12.5
Vincristine	S1241	Selleck	DMSO	L4	375
Vincristine	S1241	Selleck	DMSO	M4	125
Vincristine	S1241	Selleck	DMSO	N4	37.5
Vincristine	S1241	Selleck	DMSO	O4	12.5
Vincristine	S1241	Selleck	DMSO	B5	3.75
Vincristine	S1241	Selleck	DMSO	C5	1.25
Vincristine	S1241	Selleck	DMSO	D5	0.375
