# Supplementary material for: Comprehensive and unbiased multiparameter high-throughput screening by compaRe finds effective and subtle drug responses in AML models
Source: eLife. 2022 Feb 15;11:e73760. doi: 10.7554/eLife.73760 (PMC9020823; doi:10.7554/eLife.73760)
Supplement: Supplementary file 8. [file elife-73760-supp8.xlsx]

## Sheet: Sheet1
Clique ID	Community ID	UMAP group	Treatment_concentration(nM)
1	1		Dexamethasone_1250
2	2	2	Vincristine_3.75
3	3	1	Dexamethasone_375,Dexamethasone_125
4	4		Vincristine_1.25,Pinometostat_1250
5	4		Pinometostat_1250,Lenalidomide_37.5
6	4		Pinometostat_1250,Pinometostat_375
7	5		Dexamethasone_37.5
8	6		Palbociclib_1250
9	7	3	Navitoclax_1.25,Mitoxantrone_0.375
10	8		Dexamethasone_12.5
11	9		Palbociclib_375
12	10	1	Ponatinib_125
13	11		Dexamethasone_3.75
14	12		Palbociclib_125
15	13		Glasdegib_3.75
16	14		Palbociclib_37.5
17	15		Mitoxantrone_3.75
18	16		Mitoxantrone_1.25
19	17	3	Tretinoin_375,Tretinoin_125
20	18		Navitoclax_1250
21	19	1	Trametinib_125
22	20	3	Tretinoin_37.5
23	21		Navitoclax_375,Navitoclax_125
24	22	1	Trametinib_37.5
25	23	3	Tretinoin_12.5
26	24		Clofarabine_12.5
27	25	1	Trametinib_12.5
28	26		Trametinib_3.75
29	27	1	Ruxolitinib_375
30	28	2	Lenalidomide_1250,Lenalidomide_125
31	28	2	Lenalidomide_12500,Lenalidomide_3750
32	28	2	Lenalidomide_3750,Lenalidomide_1250
33	28	2	Lenalidomide_1250,Lenalidomide_375
34	28	2	Lenalidomide_12500,Lenalidomide_375
35	29		Midostaurin_125,Everolimus_1.25
36	29		Idasanutlin_37.5,Gilteritinib_375
37	29		Gilteritinib_375,Everolimus_1.25
38	29		Sorafenib_375,Idasanutlin_37.5
39	29		Quizartinib_125,Everolimus_1.25,Azacitidine_375
40	29		Quizartinib_125,Everolimus_1.25,Copanlisib_37.5
41	30		Copanlisib_1.25
42	31	1	Ruxolitinib_125
43	32		Quizartinib_37.5
44	33		Ruxolitinib_37.5
45	34	1	NVP-LCL161_3750
46	35		NVP-LCL161_1250
47	36		NVP-LCL161_375
48	37	1	Everolimus_125
49	38		NVP-LCL161_125
50	39	1	Everolimus_37.5
51	40		Dasatinib_125,Dasatinib_37.5
52	41	1	Everolimus_12.5
53	42		Midostaurin_375
54	43		Valproic acid_375
55	44		Everolimus_3.75
56	45	1	Copanlisib_1250
57	46	1	Copanlisib_375
58	47		Tazemetostat_3750
59	48	1	Copanlisib_125
60	49		Tazemetostat_1250
61	50	1	Ruxolitinib_3750
62	51	1	Ruxolitinib_1250
63	52		Quizartinib_375
64	53	2	Birabresib_1250
65	54		Birabresib_375
66	55		Enasidenib_37.5
67	56		Birabresib_125
68	57	1	NVP-SHP099_12500
69	58	1	NVP-SHP099_3750
70	59		NVP-SHP099_1250
71	60		Idasanutlin_3750
72	61		Selinexor_375
73	62		Idasanutlin_1250
74	63		Selinexor_125,Idasanutlin_375
75	64		Selinexor_37.5
76	65		Combo Venetoclax/azacitidine_1250,Combo Venetoclax/azacitidine_3.75
77	65		Combo Venetoclax/azacitidine_1250,Combo Venetoclax/azacitidine_37.5
78	65		Combo Venetoclax/azacitidine_375,Combo Venetoclax/azacitidine_37.5
79	65		Combo Venetoclax/azacitidine_375,Combo Venetoclax/azacitidine_125
80	65		Combo Venetoclax/azacitidine_37.5,Combo Venetoclax/azacitidine_1.25
81	65		Idasanutlin_125,Combo Venetoclax/azacitidine_37.5
82	65		Combo Venetoclax/azacitidine_12.5,Azacitidine_1250
83	65		Idasanutlin_125,Azacitidine_1250
84	66		Vidofludimus_3750
85	67	2	Birabresib_3750
86	68		Cytarabine_125
87	69		Cytarabine_37.5
88	70		Cytarabine_12.5,Combo Cytarabine/daunorubicin_12.5
89	71	1	PIM-447_3750
90	72	1	PIM-447_1250
91	73	1	PIM-447_375
92	74	1	PIM-447_125
93	75	1	PIM-447_37.5
94	76		PIM-447_12.5
95	77		Daunorubicin_12.5
96	78		Combo Cytarabine/daunorubicin_37.5
