# Supplementary material for: Comprehensive and unbiased multiparameter high-throughput screening by compaRe finds effective and subtle drug responses in AML models
Source: eLife. 2022 Feb 15;11:e73760. doi: 10.7554/eLife.73760 (PMC9020823; doi:10.7554/eLife.73760)
Supplement: Supplementary file 9. [file elife-73760-supp9.xlsx]

## Sheet: Sheet1
Antibody	Fluorochrome	Reference #	Vendor	Clone	Isotype	Lot number	dilution in assay	Channel used by COMPARE
anti-mouse CD11b	BV786	740861	BD	M1/70	IgG2b k	N/A	0.597222	VL6-H
anti-mouse Ly-6G (Gr-1)	APC	17-5931-81	ebioscience	RB6-8C5	IgG2b k	E07333-1633	0.597222	RL1-H
anti-mouse CD16/CD32	BV605	563006	BD	2.4G2	IgG2b k	7085506	0.597222	BL5-H
isotype control (CD11b)	BV786	563334	BD	R35-38	IgG2b k	7131788	0.597222
isotype control (Ly-6G)	APC	17-4031-81	ebioscience	eB149/10H5	IgG2b k	4298461	0.597222
isotype control (CD16/CD32)	BV605	563145	BD	R35-38	IgG2b k	7187700	0.597222
