# Supplementary material for: Comprehensive and unbiased multiparameter high-throughput screening by compaRe finds effective and subtle drug responses in AML models
Source: eLife. 2022 Feb 15;11:e73760. doi: 10.7554/eLife.73760 (PMC9020823; doi:10.7554/eLife.73760)
Supplement: Supplementary file 10. [file elife-73760-supp10.xlsx]

## Sheet: Sheet1
Marker	Fluorophore	Clone	Ab isotype	Vendor	Ref. No.	Lot No.	Transfer volume (nL)	Final concentration (ng)	Channel used by COMPARE
CD34	APC	563	IgG1, κ	BD Bioscience	561209	8220707	12.5	0.125	RL1-H
CD38	BV421	HB7	IgG1, k	BioLegend	356618	B272992	100	0.5	VL1-H
CD45	PE-Cy7	HI30	IgG1, k	BioLegend	304016	B286744	50	0.25	BL5-H
CD45RA	PE-CF594	HI100	IgG2b, k	BD Bioscience	562298	9079927	25	0.0315	BL3-H
IgG2b	Unconjugated	MPC-11	IgG2b, κ	Biolegend	400302	B237957	25	0.315
CD117	BV605	104D2	IgG1, κ	BD Bioscience	562687	42133	12.5	0.0625
HLA-DR	AF488	6H6	IgG2a, κ	Biolegend	307620	B271228	50	0.5	BL1-H
IgG2a	Unconjugated	MOPC-173	IgG2a, κ	Biolegend	400202	B241031	200	5
CD11b	BV786	ICRF44	IgG1, k	BioLegend	301346	B266437	75	0.375	VL6-H
CD15	BV786	W6D3	IgG1, k	BD Bioscience	741013	9332743	12.5	0.125	VL6-H
CD16	BV786	3G8	IgG1, κ	BD Bioscience	563690	9259328	25	0.125	VL6-H
CD64	BV786	10,1	IgG1, k	BioLegend	305044	B284669	50	0.375	VL6-H
CD3	V500	UCHT1	IgG1, k	BD Bioscience	561416	9191445	50	0.5
Draq7	(APC/Cy7 channel)	-	-	Biolegend	424001	234DR71000	25	0.375µM
SSC									SSC-H
